# Supplementary material for: meso-borneol- and meso-carbazole-substituted porphyrins: multifunctional chromophores with tunable electronic structures and antitumor activities
Source: Royal Society of Chemistry journal article supplement (doi:10.1039/d0nj02954h), 2021-01-01
Supplement: d0nj02954h1.pdf [file d0nj02954h1.pdf]

### Supporting Information

#### *meso*-Borneol- and *meso*-Carbazole-Substituted Porphyrins: Multifunctional Chomophores with Tunable Electronic Structures and Antitumor Activities

Bo Fu <sup>a, #</sup>, Xinyi Dong <sup>b, #</sup>, Xiaoxiao Yu <sup>a</sup>, Zhen Zhang <sup>b</sup>, Lei Sun<sup>a</sup>, Weihua Zhu <sup>b</sup>, Xu Liang <sup>b, \*</sup>  
and Haijun Xu<sup>a, \*</sup>

- a. Jiangsu Co-innovation Center of Efficient Processing and Utilization of Forest Resources, College of Chemical Engineering, Jiangsu Key Lab of Biomass-based Green Fuels and Chemicals, Nanjing Forestry University, Nanjing 210037, PR China
- b. School of Chemistry and Chemical Engineering, Jiangsu University, Zhenjiang 212013, PR China
- c. School of Chemistry and Chemical Engineering, Henan Normal University, Xinxiang 453007, Peoples R China

# These authors equally contribute to this work.

Corresponding author: Prof. Dr. Haijun Xu, E-mail: [xuhaijun@njfu.edu.cn](mailto:xuhaijun@njfu.edu.cn); Prof. Dr. Xu Liang, E-mail: [liangxu@ujs.edu.cn](mailto:liangxu@ujs.edu.cn).

#### Experimental Section

- i. HNMR spectra
- ii. High-resolution ESI-mass spectra
- iii. DPV characterizations
- iv. Scan Speed measurements

#### i. Experimental Section

**General.** <sup>1</sup>H NMR spectra were recorded on a Bruker AVANCEIII 600M spectrometer. Chemical shifts for <sup>1</sup>H NMR spectra were expressed in parts per million (ppm) relative to CDCl<sub>3</sub> ( $\delta$  = 7.26 ppm) as the internal standard. UV-Vis spectra were recorded on Shimadzu UV-2600 spectrophotometer at ambient temperature with a 1 cm quartz cell. CD spectra were performed on a JASCO-810 spectrometer. Elemental analyses for C, H and N were

performed on a Perkin Elmer 240C elemental analyzer. The High Resolution Mass Spectra (HRMS) data was performed on a LTQ Orbitrap XL spectrometer equipped with an electrospray ionization (ESI) source. Fluorescence spectra, quantum yields and the fluorescence life time of the samples were determined with a FluoroLog-UltraFast (HORIBA Instrument Inc, Edison) spectrometer equipped with a 450 W CW xenon lamp and an Open-Electrode TECooled CCD Detector (Syncerity).

**Antitumor Activity Evaluation.** The antitumor activities of **4a**, **4b**, **7b** and **7c** *in vitro* were evaluated by MTT assay against human hepatoma cells (HepG2). HepG2 cells were transferred into 96-well plates at a concentration of  $1 \times 10^3$  cells/well, and incubated for 6 h. The cells in the wells were respectively treated with target compounds at various concentration for 68 h. Then, 20  $\mu$ L MTT (4 mg/mL) was added to each well and incubated for 4 h at 37 °C. After the supernatant was discarded, 200  $\mu$ L DMSO was added to each well and the absorbance values were read at 570 nm using a microplate scanning spectrophotometer. All measurements were repeated for three time to

**Synthesis of 3,6-dibutylcarbazole 1a**<sup>[S1]</sup>. 20 mL CH<sub>2</sub>Cl<sub>2</sub> solution containing 2-bromo-2-methylpropane (4.12 g, 30.00 mmol) dropwise added to the 50 mL dehydrous CH<sub>2</sub>Cl<sub>2</sub> solution containing carbazole (2.51 g, 15.00 mmol) and AlCl<sub>3</sub> (2.00 g, 15.00 mmol) at 0°C under N<sub>2</sub>, then stirred at room temperature about 24h. The reaction was queanched by ice-water, and further extracted by CH<sub>2</sub>Cl<sub>2</sub> (30 mL x 3). The organic solvent was removed under reduced pressure. The target compound was finally purified by recrystallization (C<sub>2</sub>H<sub>5</sub>OH) to give the white solid state compound in 87% yield. <sup>1</sup>H NMR (600 MHz, CDCl<sub>3</sub>):  $\delta$  8.08 (s, 2H), 7.83 (br s, 1H), 7.46 (d, *J* = 8.4 Hz, 2H), 7.32 (d, *J* = 8.4 Hz, 2H), 1.45 (s, 18H).

**Synthesis of 3,6-dichloro-9H-carbazole 1b**<sup>[S2]</sup>. 8.0 g Carbazole was firstly dissolved in 40 mL freshly distilled DMF, and 40 mL DMF solution containing N-chlorosuccinimide (12.80 g, 96.00 mmol) was slowly added to the same solution. The mixture was continually stirred and heated at 60 °C for 3 h and the target compound was finally obtained as the light yellow solid state compound in 81% yield. <sup>1</sup>H NMR (600 MHz, CDCl<sub>3</sub>):  $\delta$  8.07 (br s, 1H), 7.97 (d, *J*

= 1.2 Hz, 2H), 7.40- 7.34 (m, 4H).

**Synthesis of 4-(3,6-di-tert-butyl-9H-carbazol-9-yl)benzaldehyde 2a**<sup>[S3]</sup>. 3,6-dibutylcarbazole **1a** and t-BuOK was mixed in the freshly distilled DMF, and stirred at 110°C for 0.5 h. Then, a 20 mL DMF solution containing 20.0 mmol *p*-fluorobenzaldehyde (2.48 g mmol) was slowly added and heated at 110°C for 36 h. After cooling to the room temperature, the mixture was directly mixed with ice-water to provide the solid state compound, and underwent filtration by Buchner funnel. The final target compound was obtained through recrystallization with ethanol in 78% yield. <sup>1</sup>H NMR (600 MHz, CDCl<sub>3</sub>): δ 10.10 (s, 1H), 8.16-8.13 (m, 2H), 8.10 (d, *J* = 8.4 Hz, 2H), 7.78 (d, *J* = 8.4 Hz, 2H), 7.48 (dd, *J* = 2,4, 9.0 Hz, 2H), 7.45 (d, *J* = 8.4 Hz, 2H), 1.47 (s, 18H).

**Synthesis of 4-(3,6-dichloro-9H-carbazol-9-yl)benzaldehyde 2b**<sup>[S4-S5]</sup>. The general synthetic procedure is similar with that of **2a**, only 3,6-dichlorocarbazole **1b** was used instead. The target compound was finally obtained through recrystallization with ethanol to give the yellow solid state compound in a 70%. <sup>1</sup>H NMR (600 MHz, CDCl<sub>3</sub>): δ 10.13 (s, 1H), 8.15 (d, *J* = 7.8 Hz, 2H), 8.05 (d, *J* = 1.2 Hz, 2H), 7.74 (d, *J* = 8.4 Hz, 2H), 7.42- 7.39 (m, 4H).

**Synthesis of 5-(4-(3,6--dibutyl-9-(4-N-benzoylphenyl))carbazole)phenyl)-dipyrromethane 3a**<sup>[S6-S7]</sup>. Under Ar, the freshly distilled pyrrole (50 mL, 704.00 mmol, excess amount) and trifluoroacetic acid (0.21 mL, 0.28 mmol) was dissolved in 100 mL dry CH<sub>2</sub>Cl<sub>2</sub>, and 3,6-dibutyl-9-(4 -N-benzoylphenyl)carbazole (0.71 g, 1.84 mmol) was slowly added. The reaction mixture stirred for another 1 h. After the reaction was quenched by saturated NaOH solution, washing with distilled water, extracting with CH<sub>2</sub>Cl<sub>2</sub>, and distilling to fully remove the excess amount of pyrrole. The residues was finally purified through silica gel column chromatography with CH<sub>2</sub>Cl<sub>2</sub> as eluent to give the pure yellow solid state compound in 88% yield. <sup>1</sup>H NMR (600 MHz, CDCl<sub>3</sub>): δ 8.13 (d, *J* = 1.2 Hz, 2H), 8.00 (s, 2H), 7.49 (d, *J* = 8.4 Hz, 2H), 7.45 (dd, *J* = 1.8, 7.8 Hz, 2H), 7.40 (d, *J* = 8.4 Hz, 2H), 7.35 (d, *J* = 8.4 Hz, 2H), 6.75-6.74 (m, 2H), 6.22- 6.20 (m, 2H), 5.99 (s, 2H), 5.57 (s, 1H), 1.48 (s, 18H).

**Synthesis of 5-(4-(3,6-dichloro-9-(4-N-benzoylphenyl))carbazole)phenyl)-dipyrromethane 3b.** The general synthetic procedure is with that of **3a**, excepting 3,6-dibutylcarbazole **6b** was used instead. The target compound was finally obtained as the organic solid state compound in a 88% yield.  $^1\text{H}$  NMR (600 MHz,  $\text{CDCl}_3$ ):  $\delta$  8.16 (d,  $J$  = 1.8 Hz, 2H), 8.01 (s, 2 H), 7.47 (dd,  $J$  = 1.8, 9.6 Hz, 2H), 7.44-7.39 (m, 4H), 7.24 (d,  $J$  = 9.0 Hz, 2H), 6.76-6.75 (m, 2 H), 6.22- 6.20 (m, 2H) 5.98 (s, 2 H), 5.58 (s, 1H).

**Synthesis of 4-(9H-carbazol-9-yl)benzaldehyde 5a.** The general synthetic procedure is similar with that of **2a**, excepting carbazole was used instead. The arget compound was finally obtained as the pure yellow solid state compound in 68%.  $^1\text{H}$  NMR (600 MHz,  $\text{CDCl}_3$ )  $\delta$  10.12 (s, 1H), 8.14 (t,  $J$  = 7.8 Hz, 4H), 7.79 (d,  $J$  = 8.4 Hz, 2H), 7.49 (d,  $J$  = 8.4 Hz, 2H), 7.45-7.42 (m, 2H), 7.34- 7.32 (m, 2H).

**Synthesis of 4-(3,6-dibromo-9H-carbazol-9-yl)benzaldehyde 5b<sup>[S8]</sup>.** 5.0 g **4-(9H-carbazol-9-yl)benzaldehyde 5a** was dissolved in 145 mL freshly distilled  $\text{CH}_2\text{Cl}_2$  solution, and a  $\text{CH}_2\text{Cl}_2$  solution containing 1.45 mL  $\text{Br}_2$  (56.12 mmol) was dropwise added. The reaction was kept at room temperature over 6h, and the excess amount of  $\text{Br}_2$  was neutralized by the saturated NaOH solution. After extraction with  $\text{CH}_2\text{Cl}_2$  and seperation, removal of organic solvent and recrystallization with  $\text{C}_2\text{H}_5\text{OH}$ , the target compound was finally obtained as a deep-yellow solid compound in a 82% yield.  $^1\text{H}$  NMR (600 MHz,  $\text{CDCl}_3$ )  $\delta$  10.13 (s, 1H), 8.25-8.20 (m, 2H), 8.14 (dd,  $J$  = 2.4, 8.4 Hz, 2H), 7.74(dd,  $J$  = 8.4, 19.2 Hz, 2H), 7.55-7.50 (m, 2H), 7.35 (dd,  $J$  = 8.4,12.6 Hz, 2H).

**Synthesis of 4-(3,6-diiodo-9H-carbazol-9-yl)benzaldehyde 5c<sup>[S9]</sup>.** 5.0 g **4-(9H-carbazol-9-yl)benzaldehyde 5a** was dissolved in 125 mL  $\text{CH}_3\text{COOH}$ , stirred and heated at 80 °C. After **5a** was fully dissolved into the solution, KI (4.13 g, 24.83 mmol) and  $\text{KIO}_3$ (3.00 g, 14.00 mmol) was added, and the reaction mixture was stirred at 80 °C for 5 h. Then, the mixture was washed by excess amount of 5%  $\text{NaHSO}_3$  water solution to remove extra  $\text{I}_2$  and  $\text{KIO}_3$ . After extraction with  $\text{CH}_2\text{Cl}_2$ , drying over anhydrous  $\text{Na}_2\text{SO}_4$ , the organic solvent

was removed under reduced pressure. The residues was purified by recrystallization with THF. The target compound was finally obtained as the brown solid state compound in a 84% yield. <sup>1</sup>H NMR (600 MHz, CDCl<sub>3</sub>) δ 10.13 (s, 1H), 8.41 (s, 2H), 8.13 (d, *J* = 7.2 Hz, 2H), 7.72 (t, *J* = 9.0 Hz, 4H), 7.22 (d, *J* = 8.4 Hz, 2H).

**Synthesis of 5-(4-(9-(4 -N-benzoylphenyl))carbazole)phenyl)-dipyrrromethane 6a.** The general synthetic procedure is similar with that of **8a**, except 4-(9H-carbazol-9-yl)benzaldehyde **5a** was used instead. The target compound was finally obtained as the yellow solid state compound in a 82.0% yield. <sup>1</sup>H NMR (600 MHz, CDCl<sub>3</sub>) δ 8.13 (d, *J* = 7.8 Hz, 2H), 7.99 (s, 2H), 7.51- 7.49 (m, 2H), 7.42 (d, *J* = 8.4 Hz, 2H), 7.40- 7.38 (m, 4 H), 7.29- 7.26 (m, 2 H), 6.75- 6.74 (m, 2 H), 6.22- 6.20 (m, 2 H), 6.00 (s, 2 H), 5.58(s, 1H).

**Synthesis of 5-(4-(3,6-dibromo-9-(4-N-benzoylphenyl))carbazole)phenyl)-dipyrrromethane 6b.** The general synthetic procedure is similar with that of **3a**, excepting 4-(3,6-dibromo-9H-carbazol-9-yl)benzaldehyde **5b** was used instead. The target compound was finally obtained as the orange solid state one in a 80% yield. <sup>1</sup>H NMR (600 MHz, CDCl<sub>3</sub>) δ 8.03 (d, *J* = 1.8 Hz, 4H), 7.46-7.43 (m, 4H), 7.37 (dd, *J* = 1.8, 8.4 Hz, 2H), 7.31 (d, *J* = 9.0 Hz, 2H), 6.78-6.77 (m, 2H), 6.25- 6.23 (m, 2H) 6.00 (s, 2H), 5.60 (s, 1H).

**Synthesis of 5-(4-(3,6-diiodo-9-(4-N-benzoylphenyl))carbazole)phenyl)-dipyrrromethane 6c.** The general synthetic procedure is similar with that of **3a**, excepting 4-(3,6-diiodo-9H-carbazol-9-yl)benzaldehyde **5c** was used instead. The target compound was finally obtained as the orange solid state one in an 88% yield. <sup>1</sup>H NMR (600 MHz, CDCl<sub>3</sub>) δ 8.38 (d, *J* = 1.8 Hz, 2H), 8.04 (s, 2H), 7.65 (d, *J* = 9.0 Hz, 2H), 7.45- 7.41 (m, 4H), 7.16 (d, *J* = 8.4 Hz, 2H), 6.78 (s, 2 H), 6.22 (s, 2H), 5.99 (s, 2H), 5.60 (s, 1 H).

ii.  $^1\text{H}$ NMR spectra

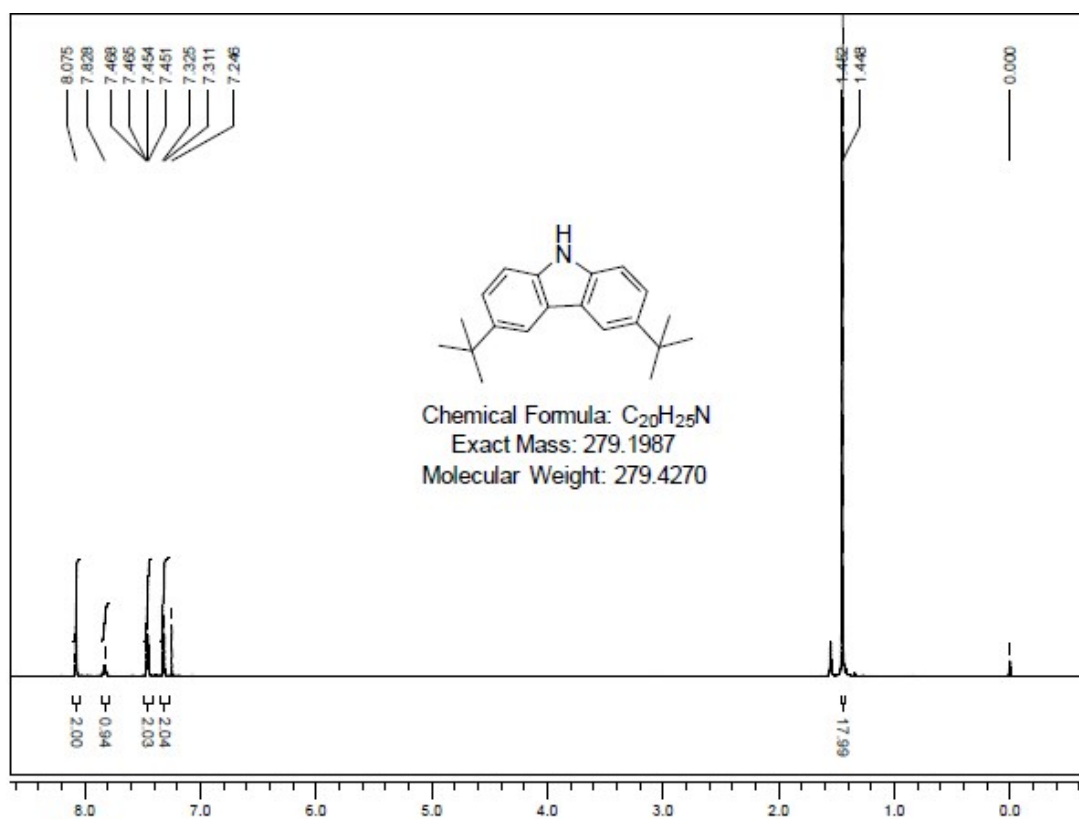

Figure S1  $^1\text{H}$ NMR spectra of **1a**.

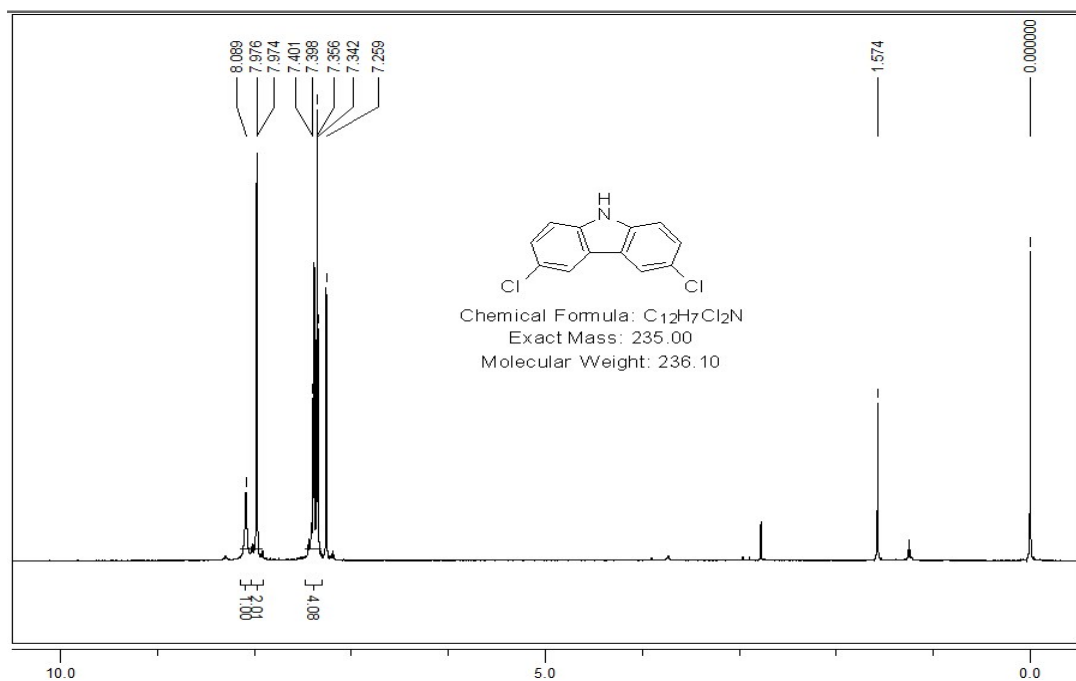

Figure S2  $^1\text{H}$ NMR spectra of **1b**.

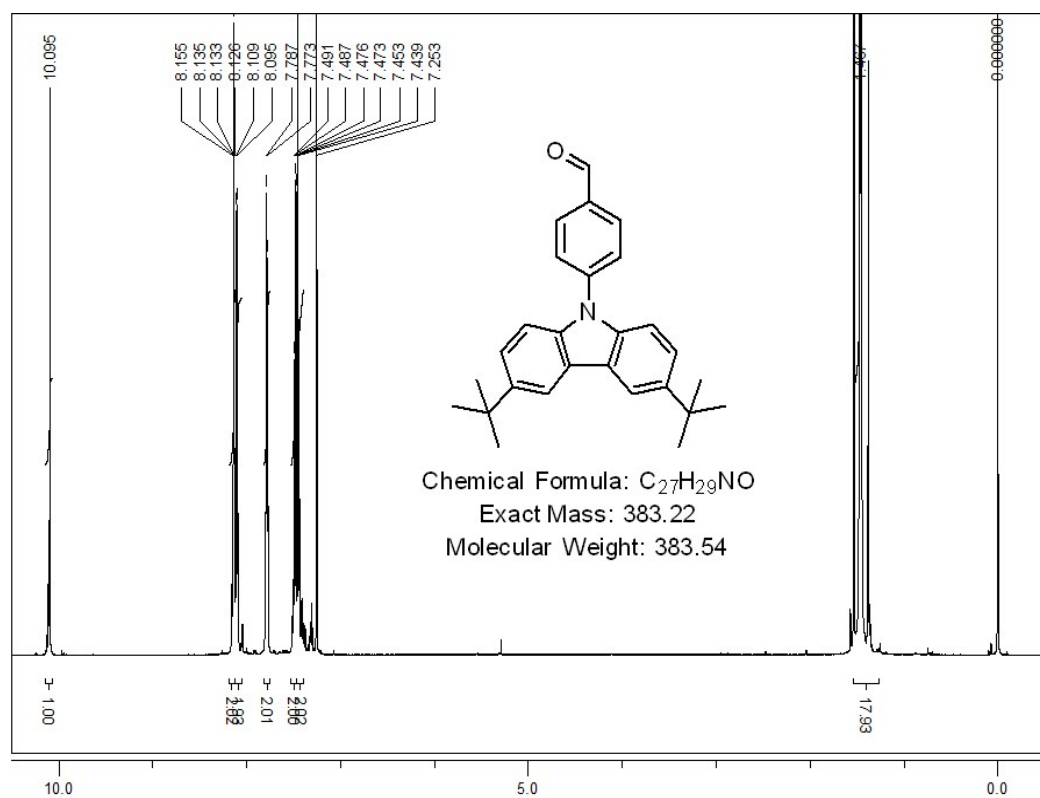

Figure S3  $^1H$ NMR spectra of **2a**.

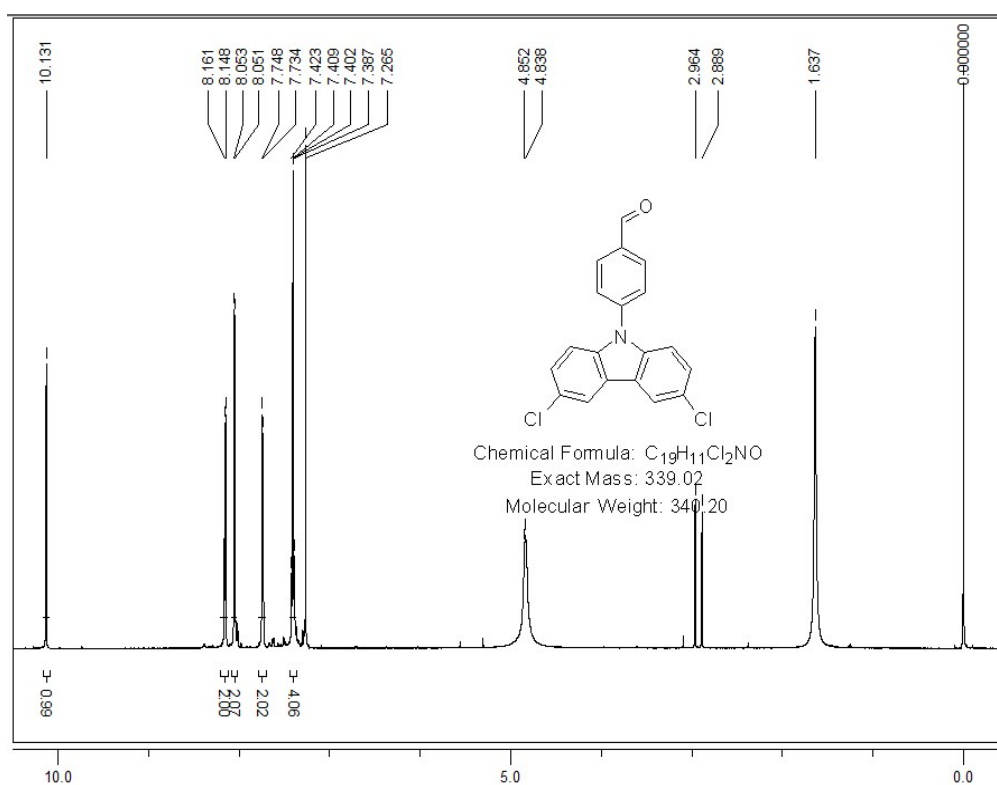

Figure S4  $^1H$ NMR spectra of **2b**.

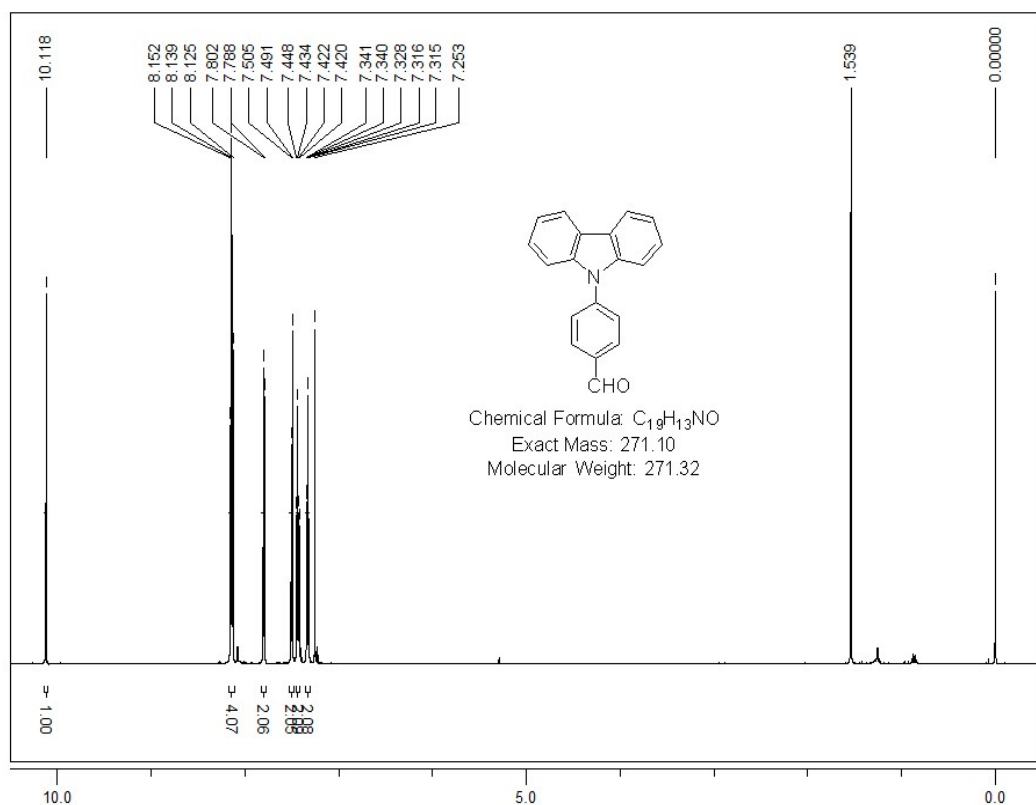

Figure S5 <sup>1</sup>H NMR spectra of **5a**.

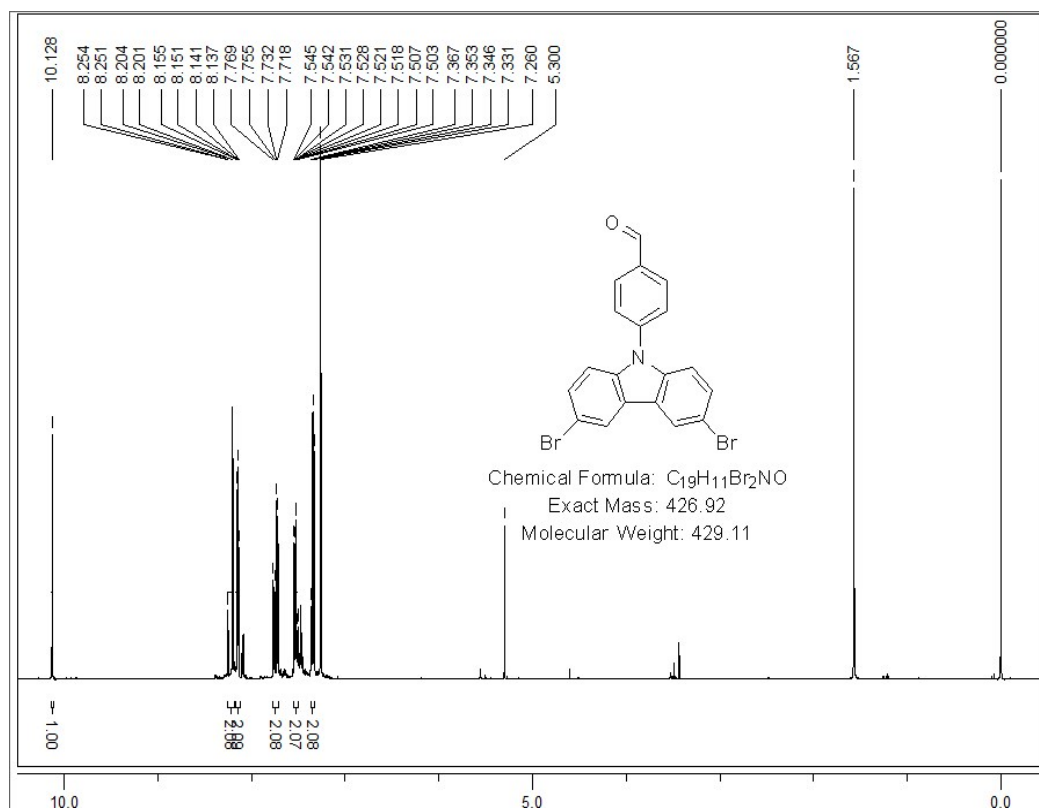

Figure S6 <sup>1</sup>H NMR spectra of **5b**.

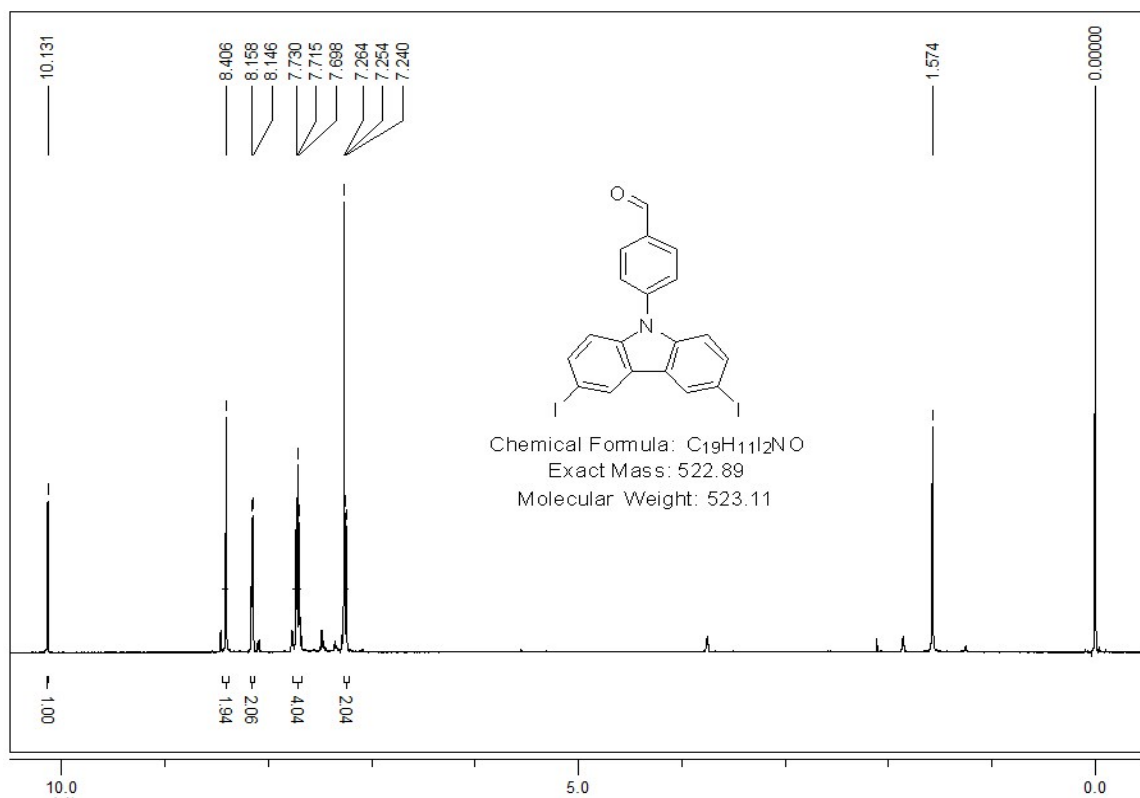

Figure S7  $^1H$ NMR spectra of **5c**.

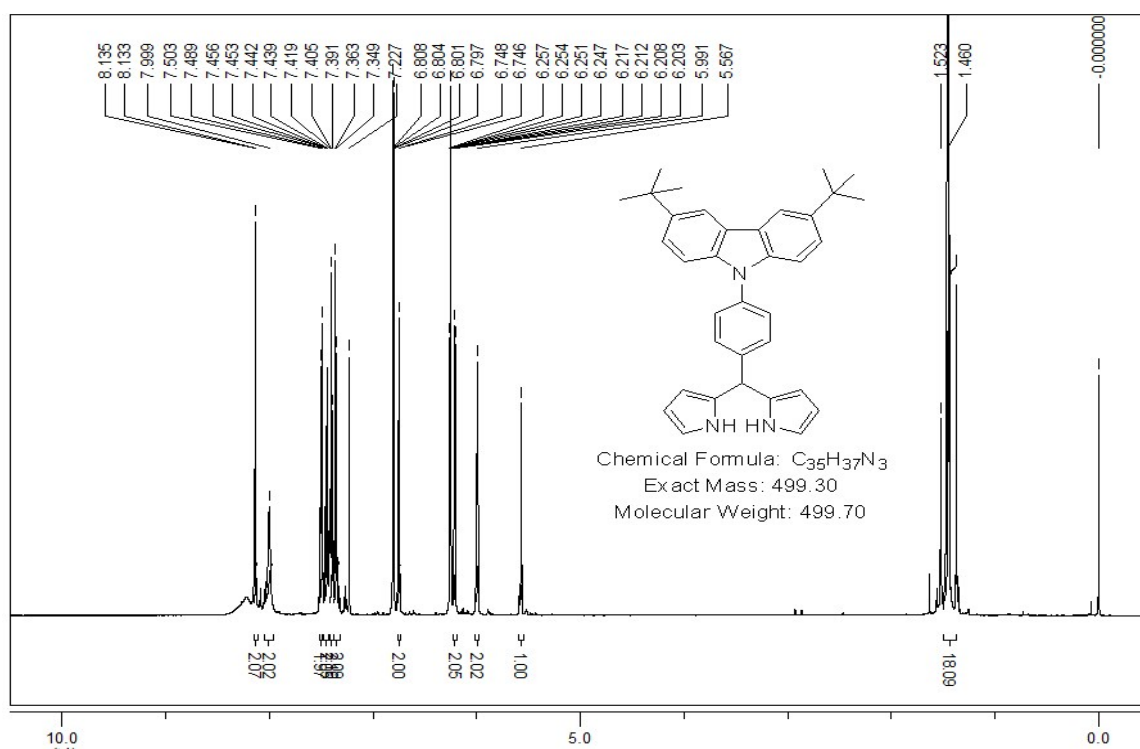

Figure S8  $^1H$ NMR spectra of **3a**.

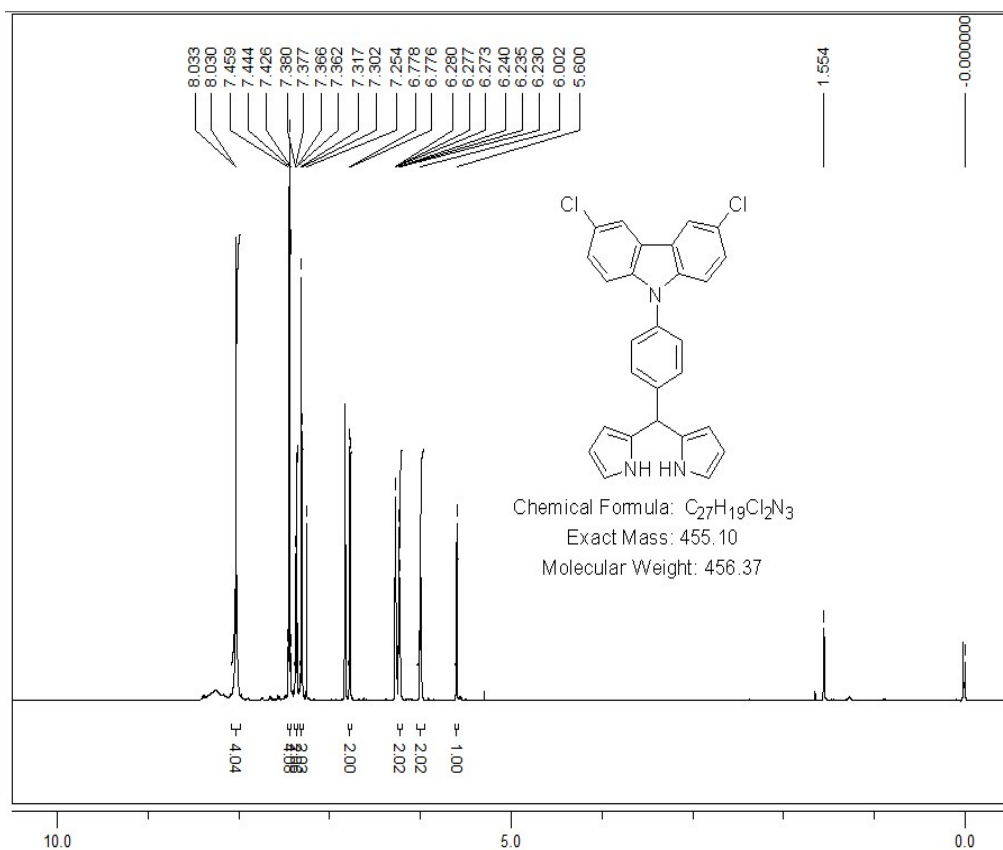

Figure S9 <sup>1</sup>H NMR spectra of **3b**.

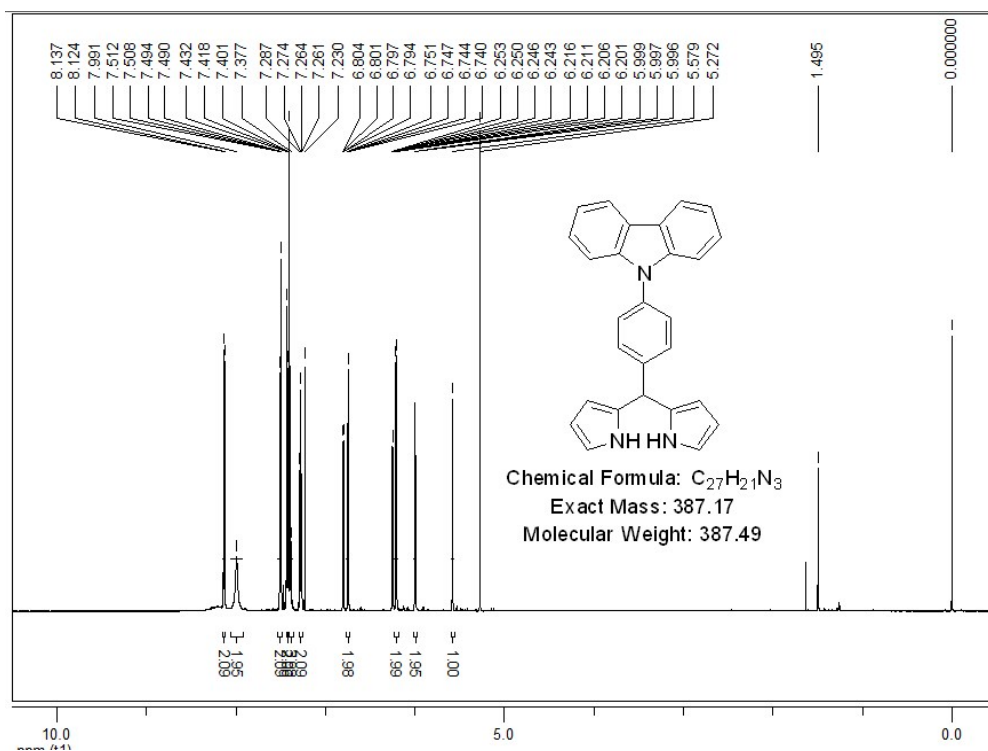

Figure S10 <sup>1</sup>H NMR spectra of **6a**.

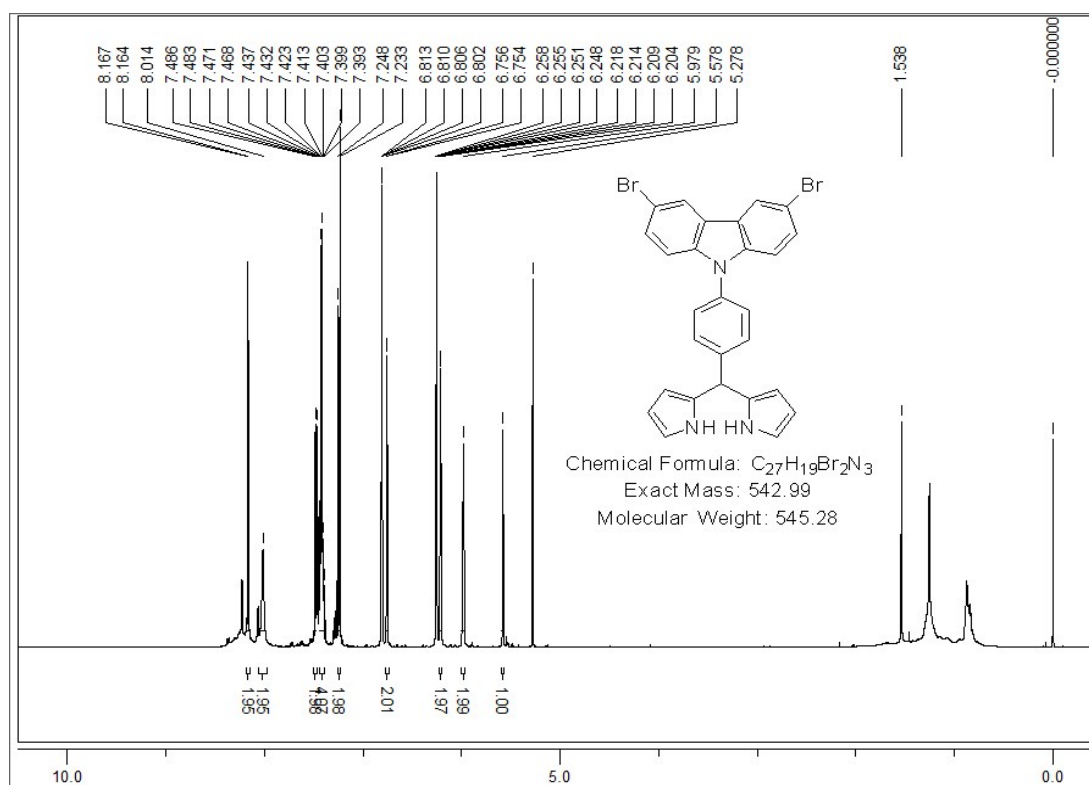

Figure S11  $^1H$ NMR spectra of **6b**.

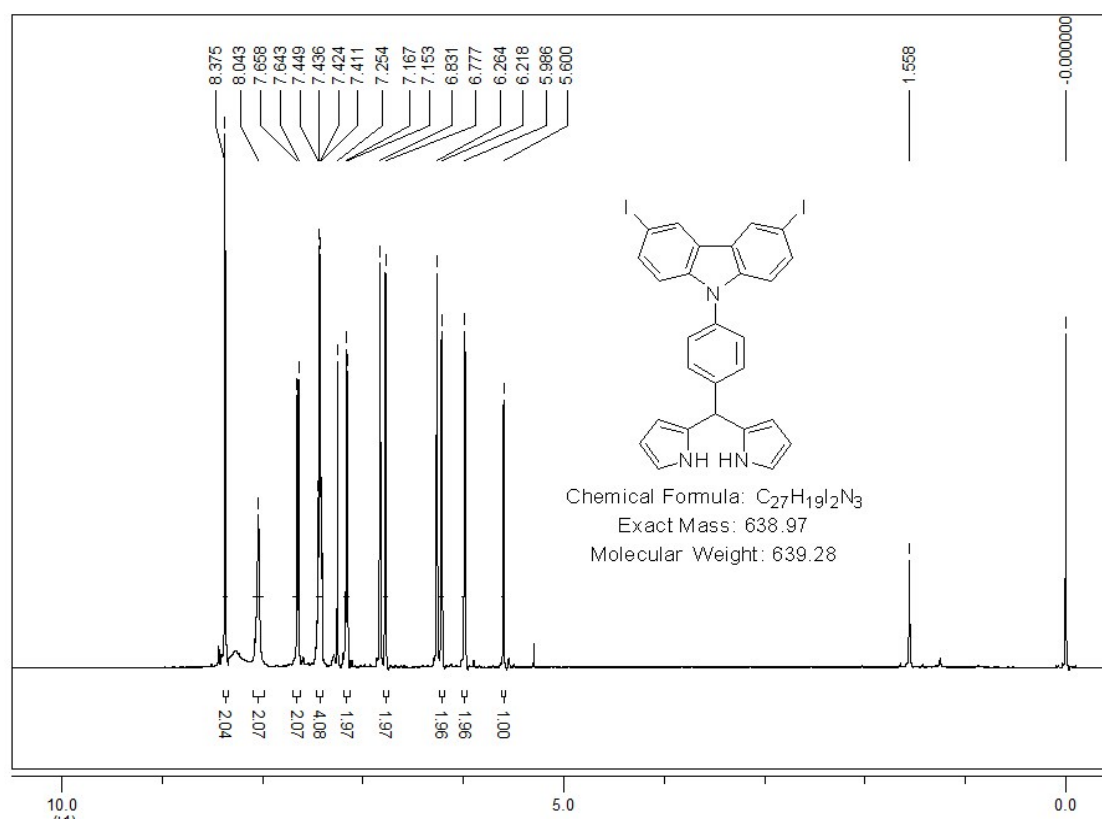

Figure S12  $^1H$ NMR spectra of **6c**.

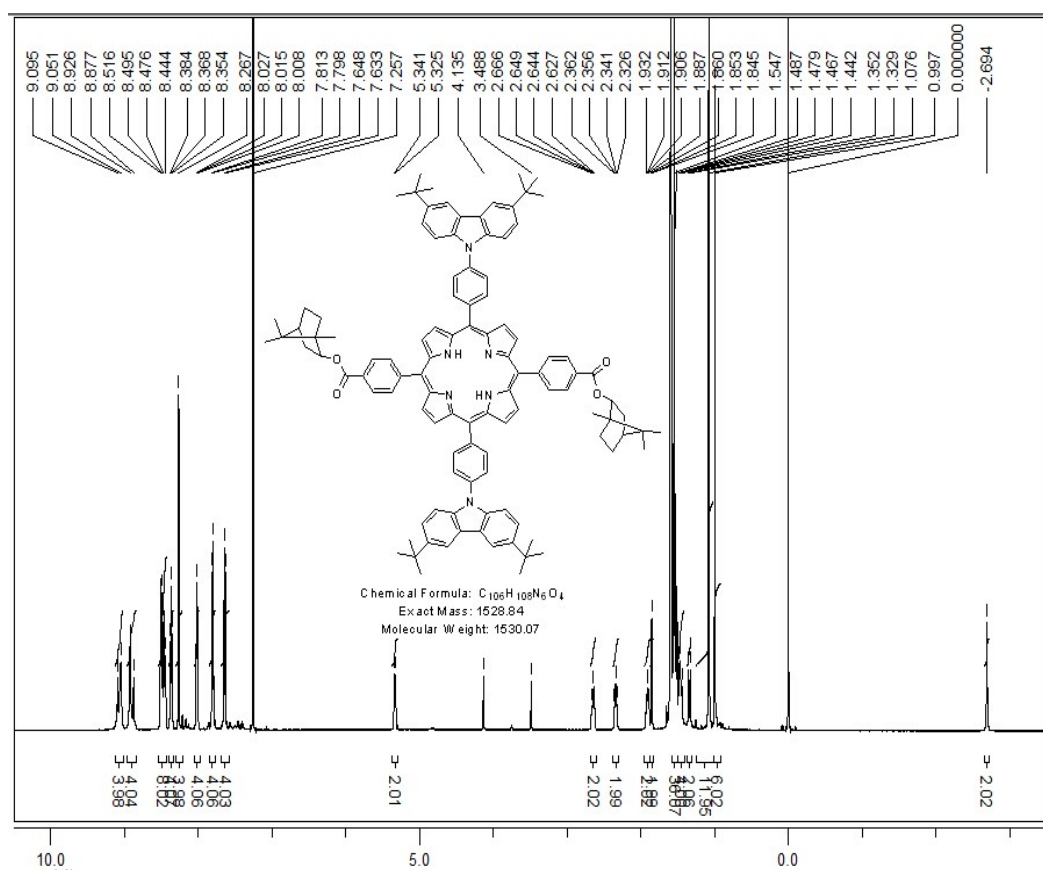

Figure S13  $^1H$ NMR spectra of **4a**.

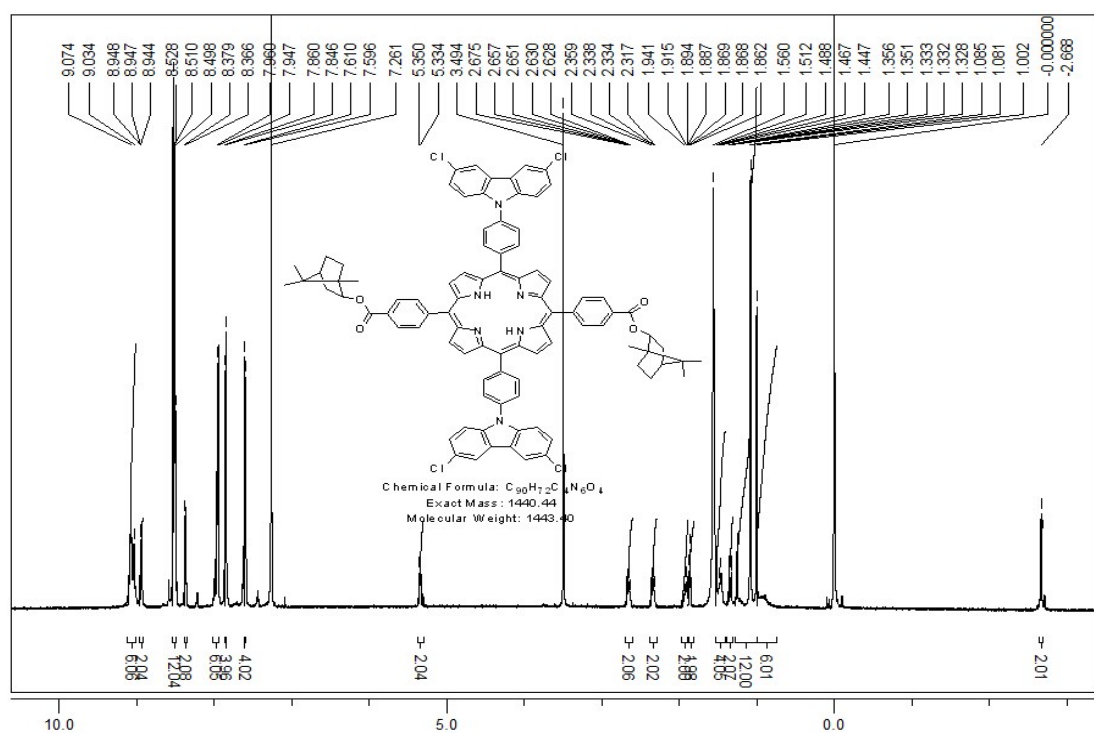

Figure S14  $^1H$ NMR spectra of **4b**.

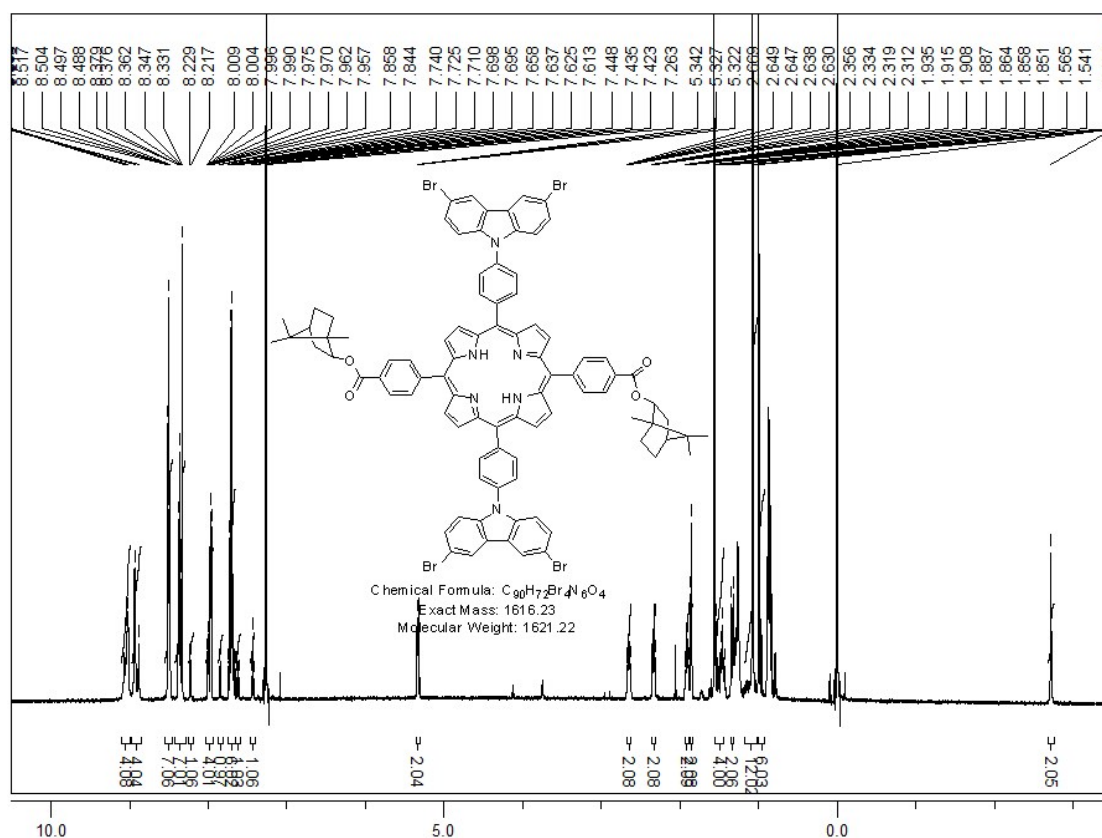

Figure S15  $^1\text{H}$ NMR spectra of **7b**.

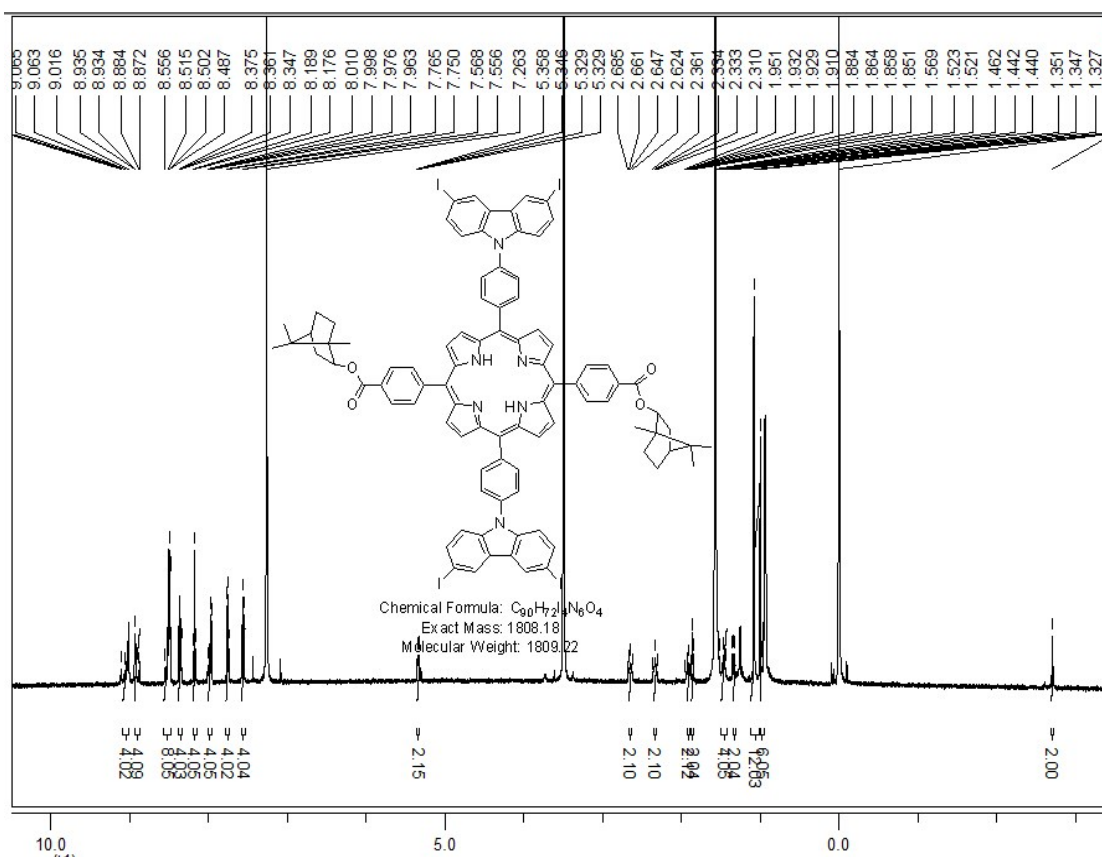

Figure S16  $^1\text{H}$ NMR spectra of **7c**.

### iii. High-resolution ESI-mass spectra

t-Bu-BP-Porphyrin-YXX\_160224143332 #11 RT: 0.19 AV: 1 NL: 3.06E5  
T: FTMS + c ESI Full ms [1000.00-2000.00]

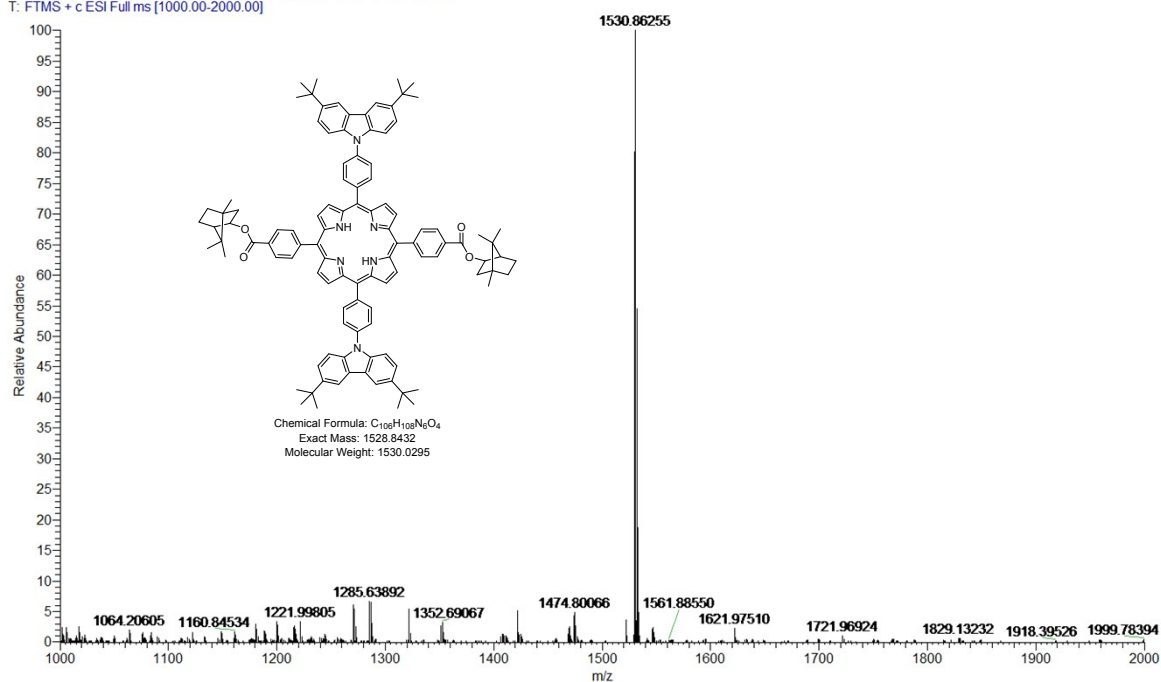

t-Bu-BP-Porphyrin-YXX\_160224143332 #11 RT: 0.19 AV: 1 NL: 3.06E5  
T: FTMS + c ESI Full ms [1000.00-2000.00]

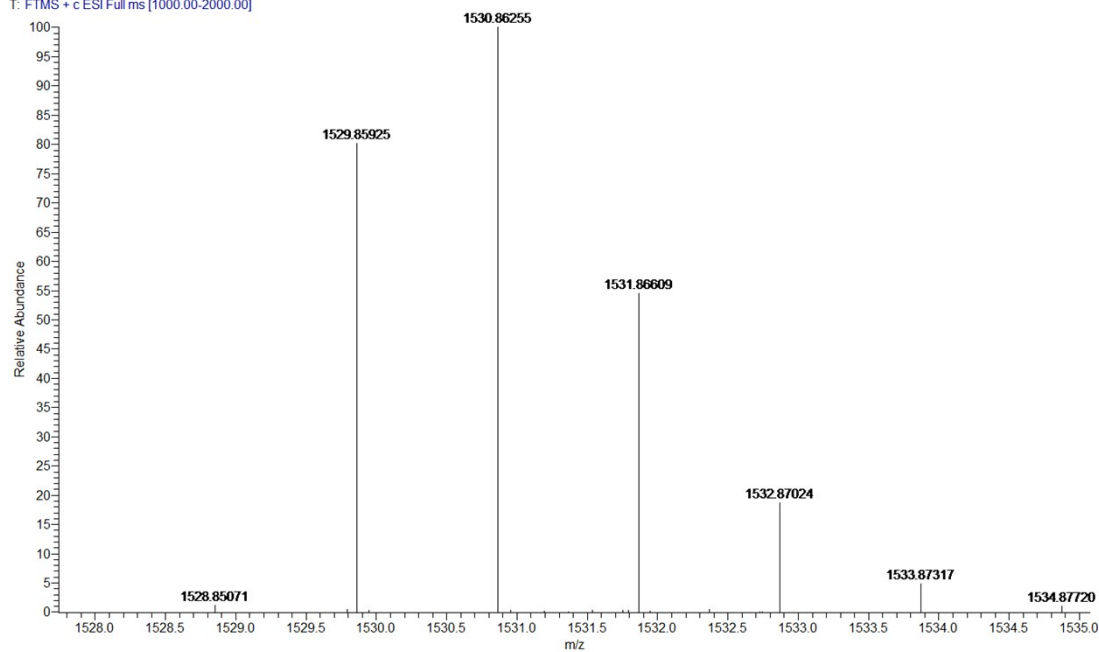

Figure S17 HR-ESI-mass spectra of **4a**.

T: FTMS + c ESI Full ms [1000.00-2000.00]

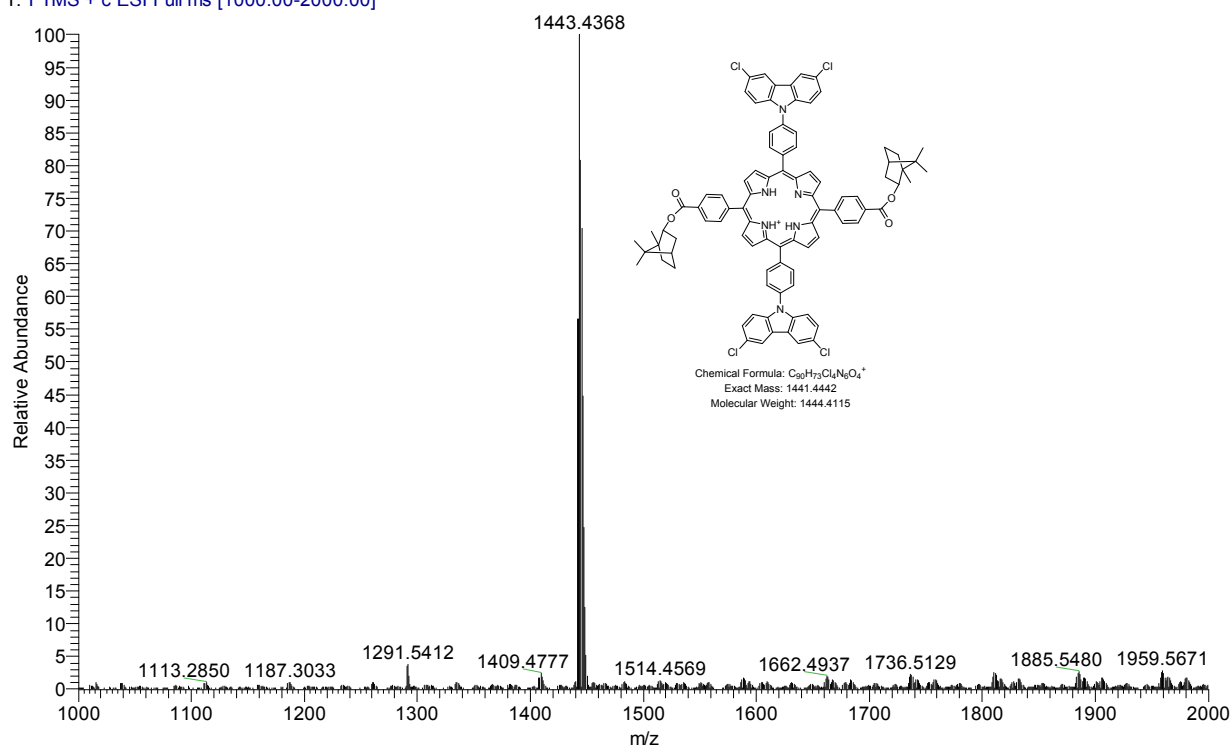

T: FTMS + c ESI Full ms [1000.00-2000.00]

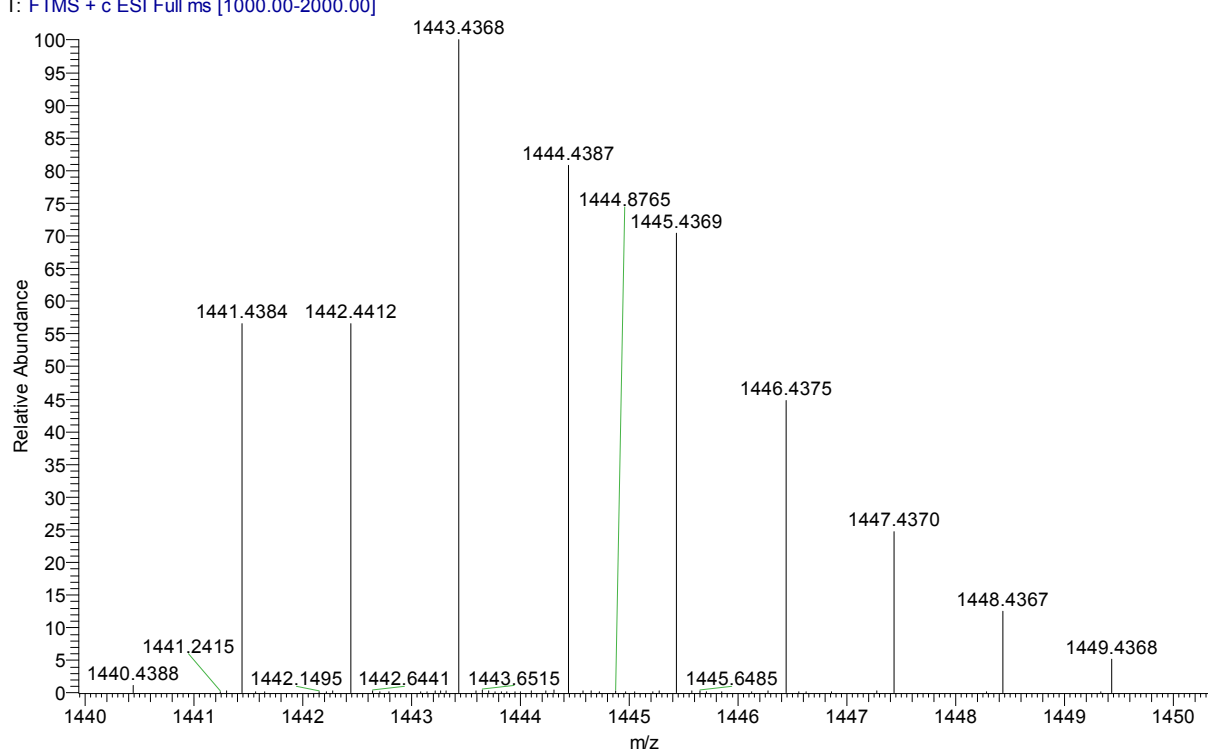

Figure S18 HR-ESI-mass spectra of **4b**.

T: FTMS + c ESI Full ms [700.00-1800.00]

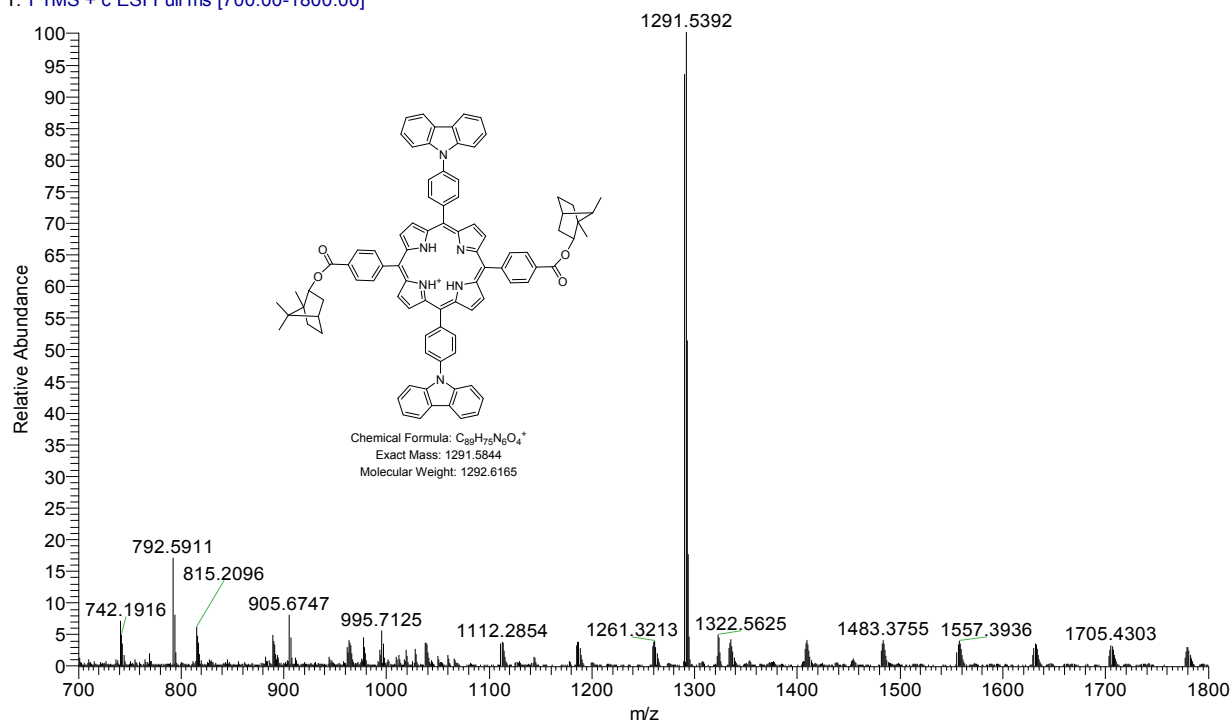

T: FTMS + c ESI Full ms [700.00-1800.00]

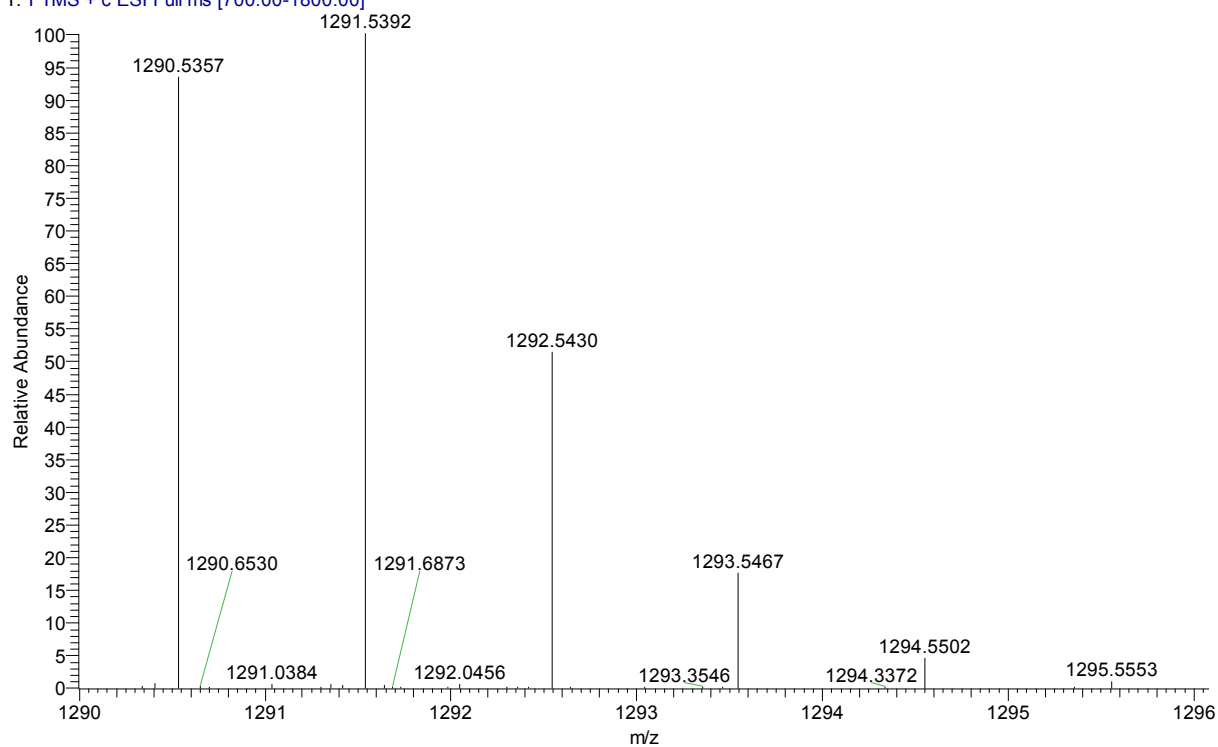

Figure S19 HR-ESI-mass spectra of 7a.

Di-Br-Carbazole-POR-1616\_151203091548 #14 RT: 0.13 AV: 1 NL: 1.86E5  
T: FTMS + p ESI Full ms [1110.00-1850.00]

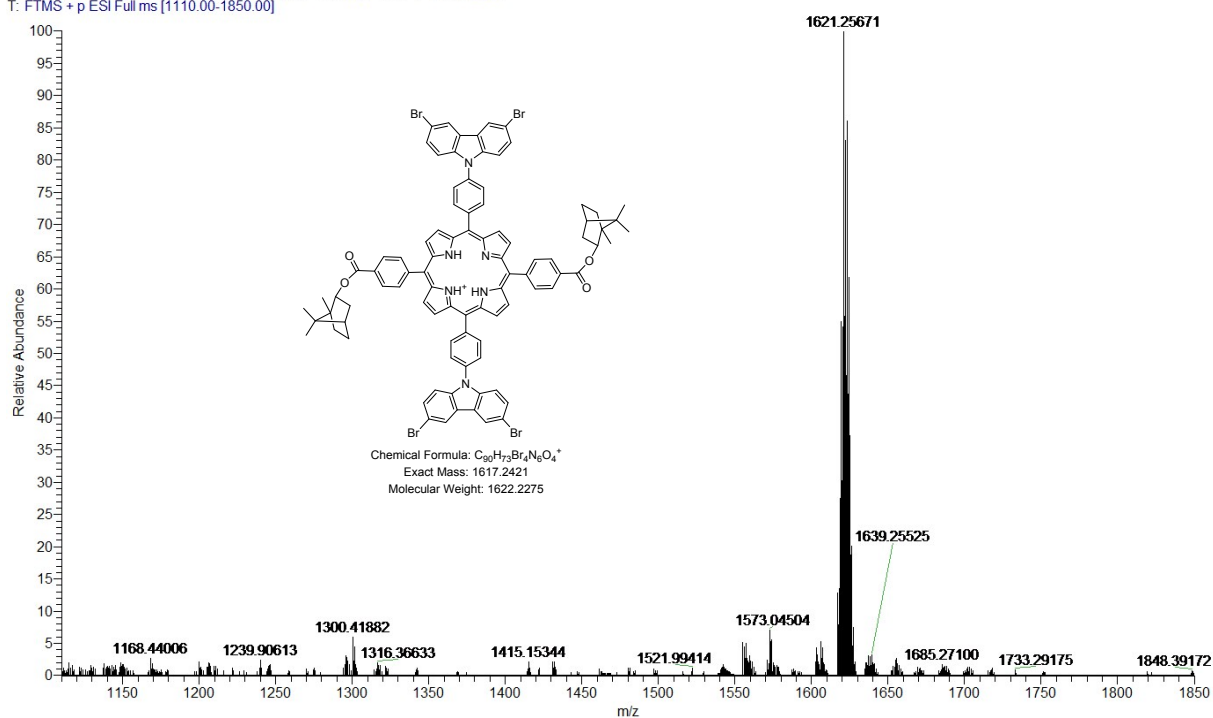

Di-Br-Carbazole-POR-1616\_151203091548 #14 RT: 0.13 AV: 1 NL: 1.86E5  
T: FTMS + p ESI Full ms [1110.00-1850.00]

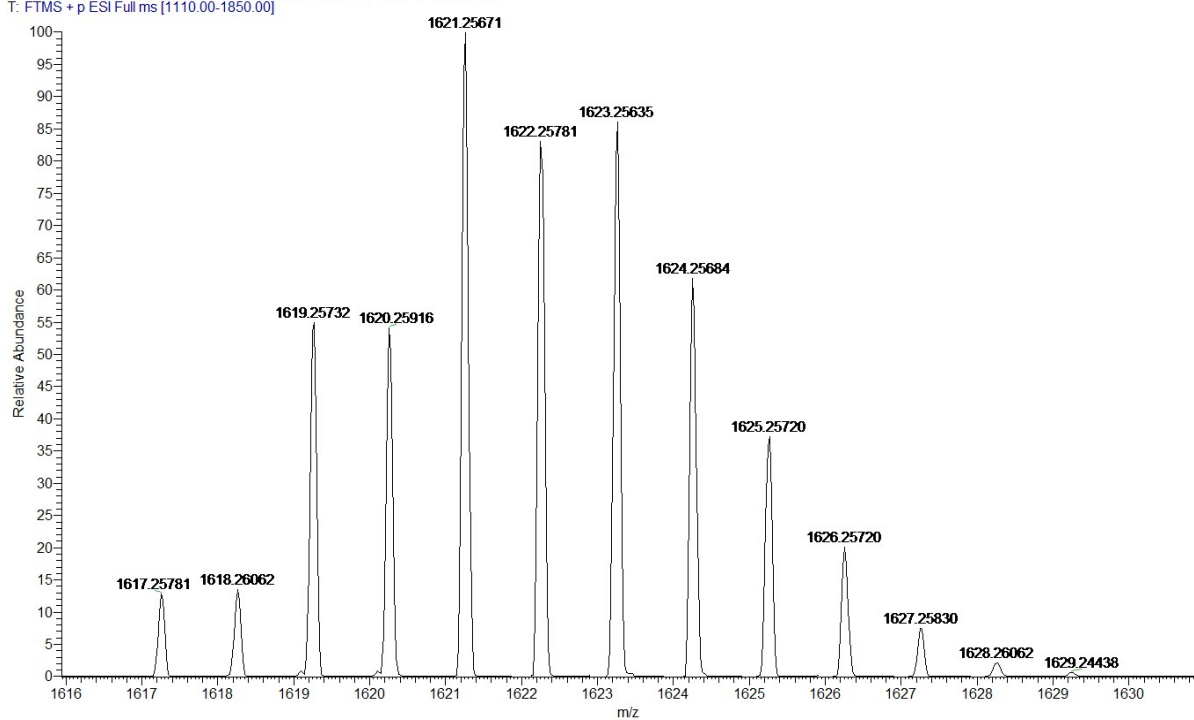

Figure S20 HR-ESI-mass spectra of 7b.

T: FTMS + c ESI Full ms [1000.00-2000.00]

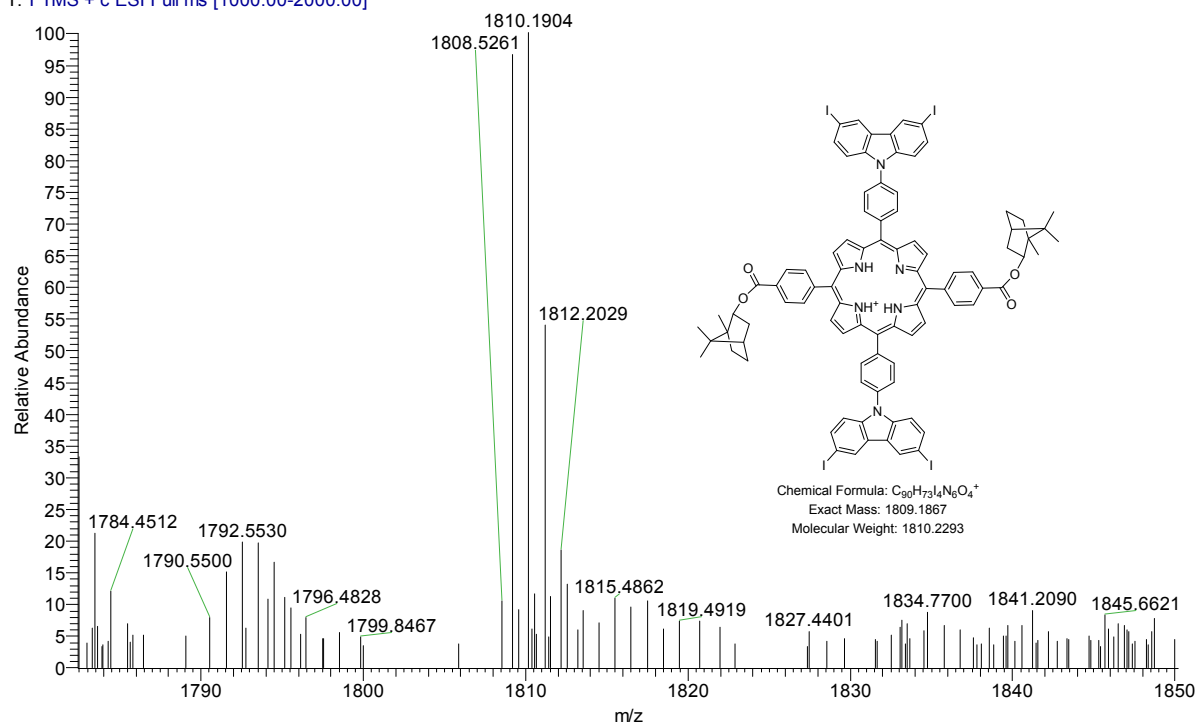

T: FTMS + c ESI Full ms [1000.00-2000.00]

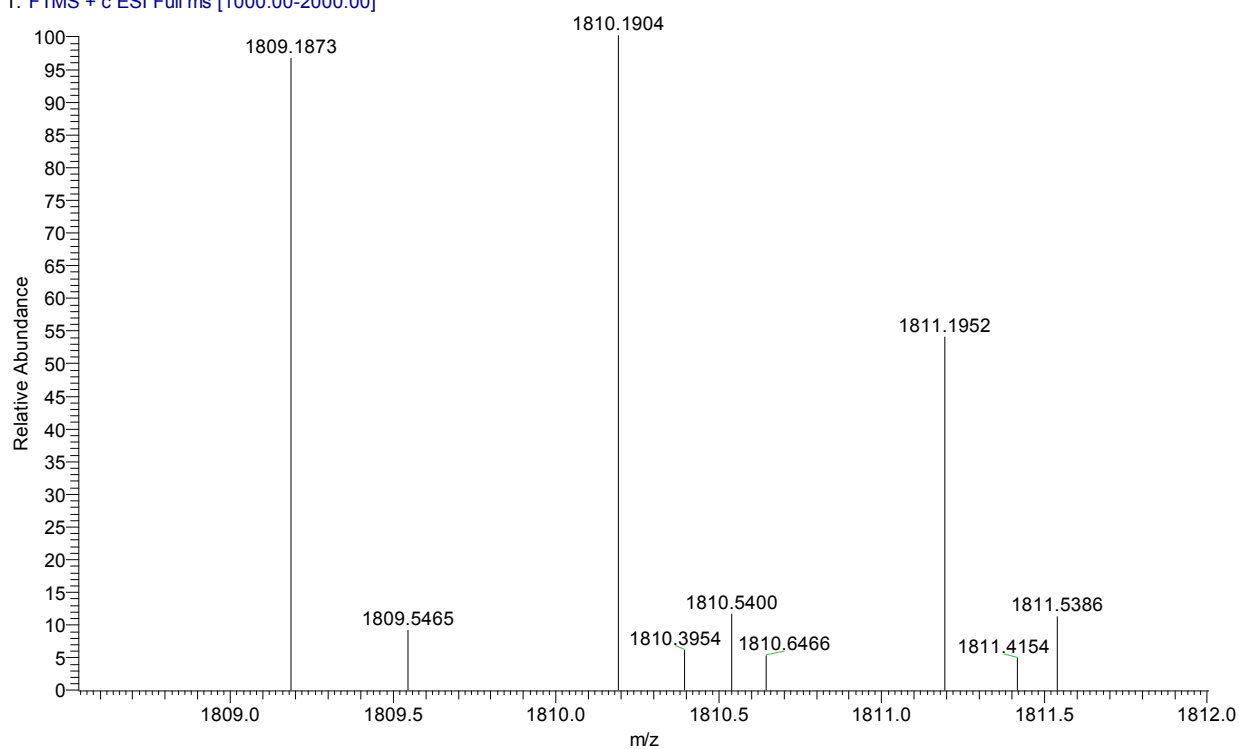

Figure S21 HR-ESI-mass spectra of **7c**.

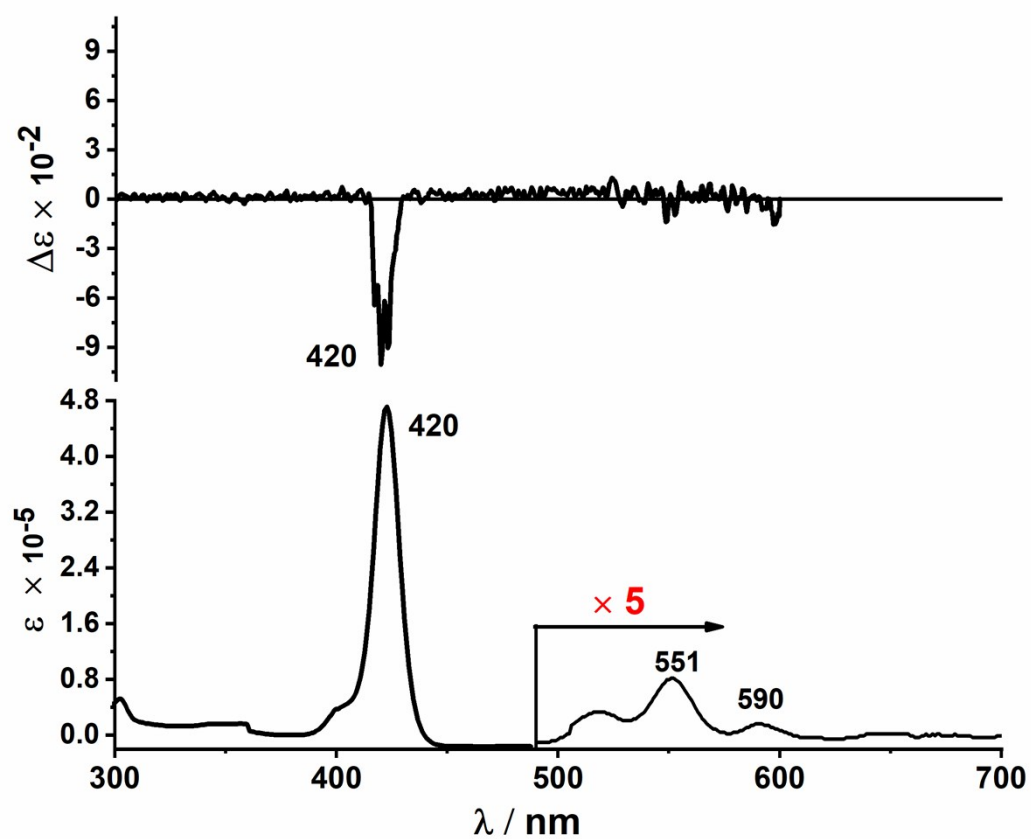

Figure S22 UV-vis (bottom) and circular dichroism spectra (up) of **Zn(II)4b** in  $\text{CH}_2\text{Cl}_2$ .

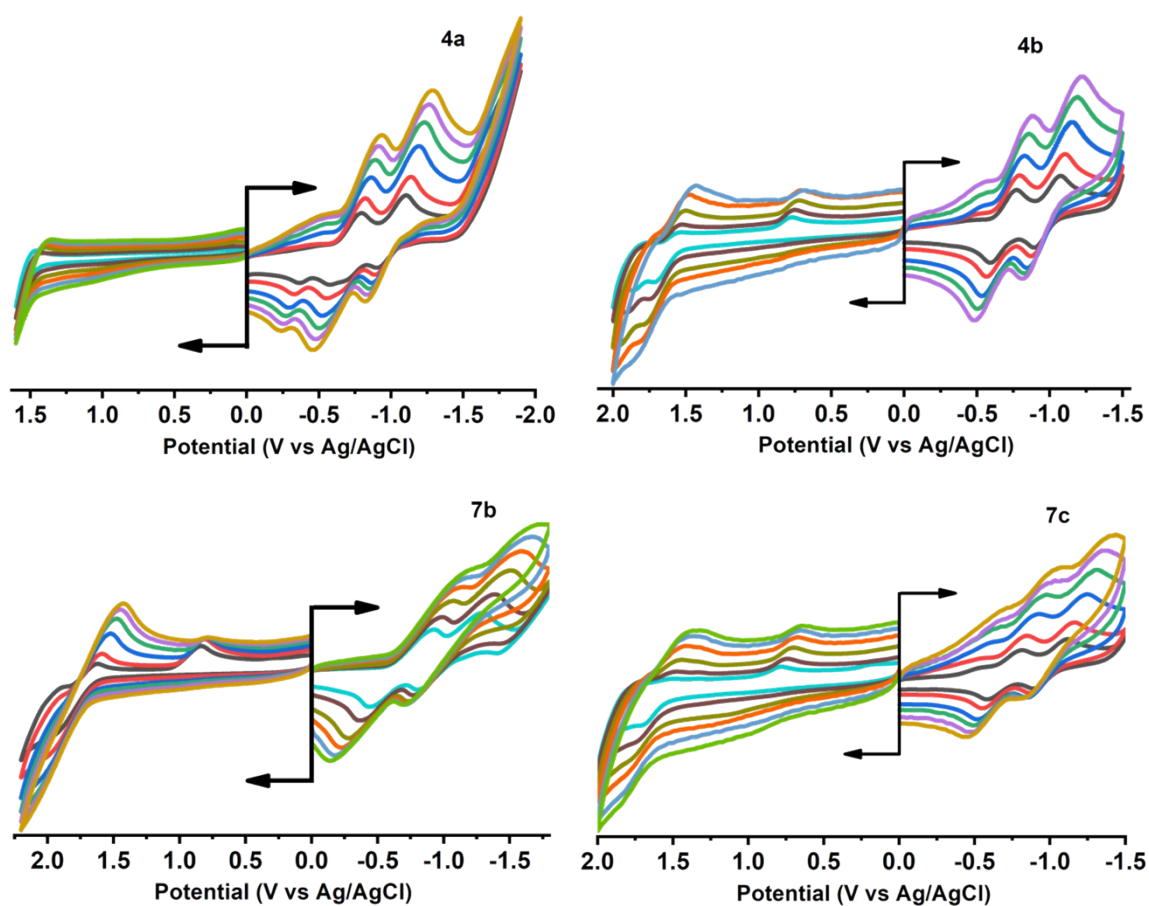

Figure S23 Cyclic voltammetry of **4a-4b** and **7b-c** in o-dichlorobenzene at 10-500 mV/s speeds.

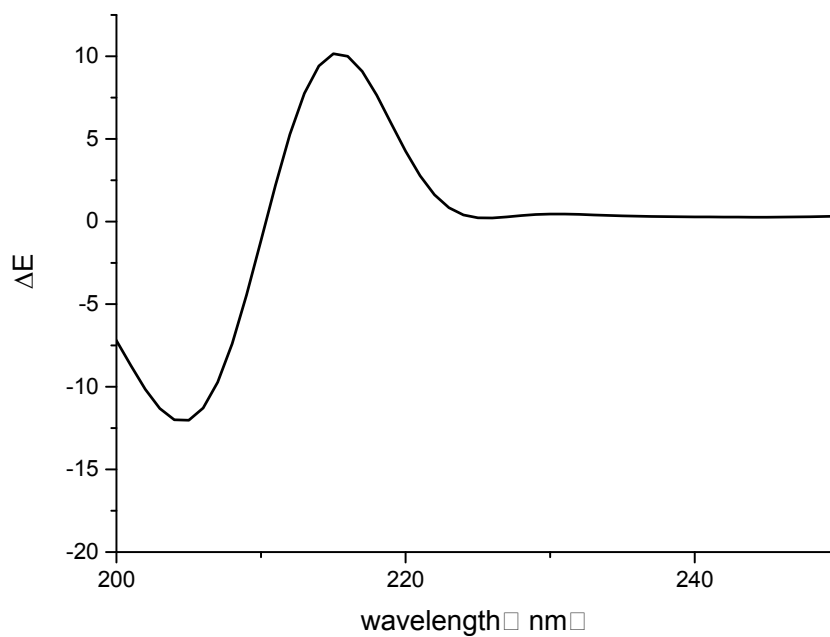

Figure S24 CD spectra of (-)-Borneol in DCM

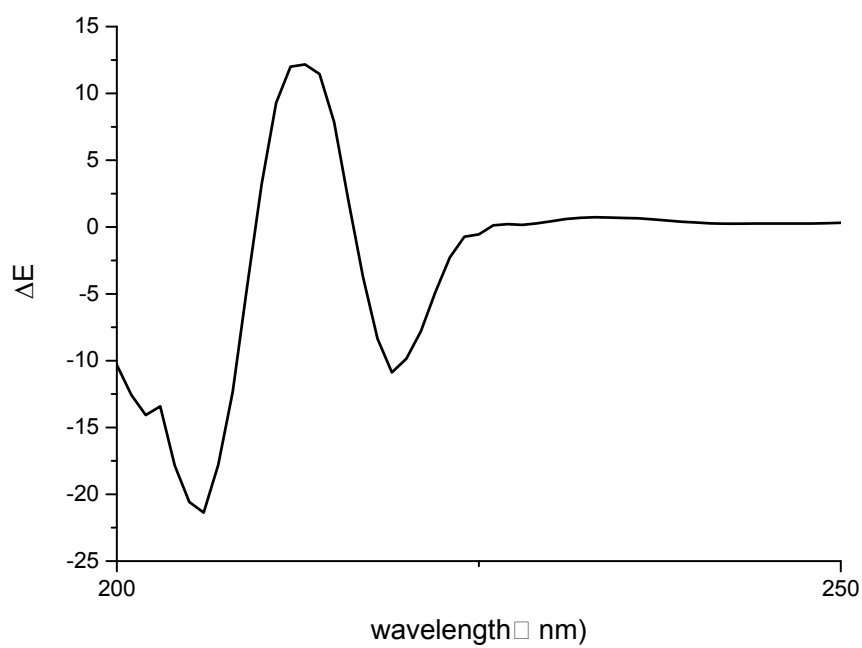

**Figure S25** CD spectra of **4a** in DCM

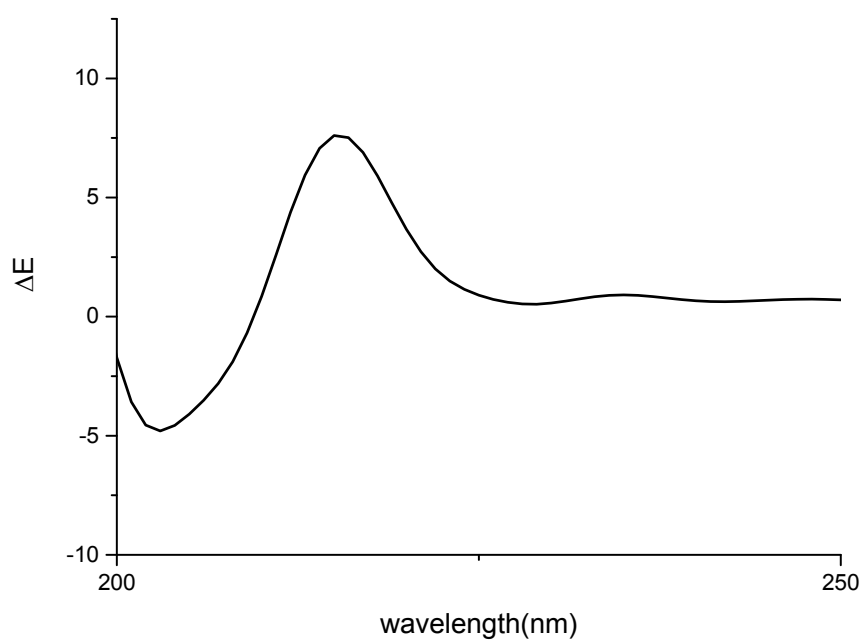

**Figure S26** CD spectra of **4b** in DCM

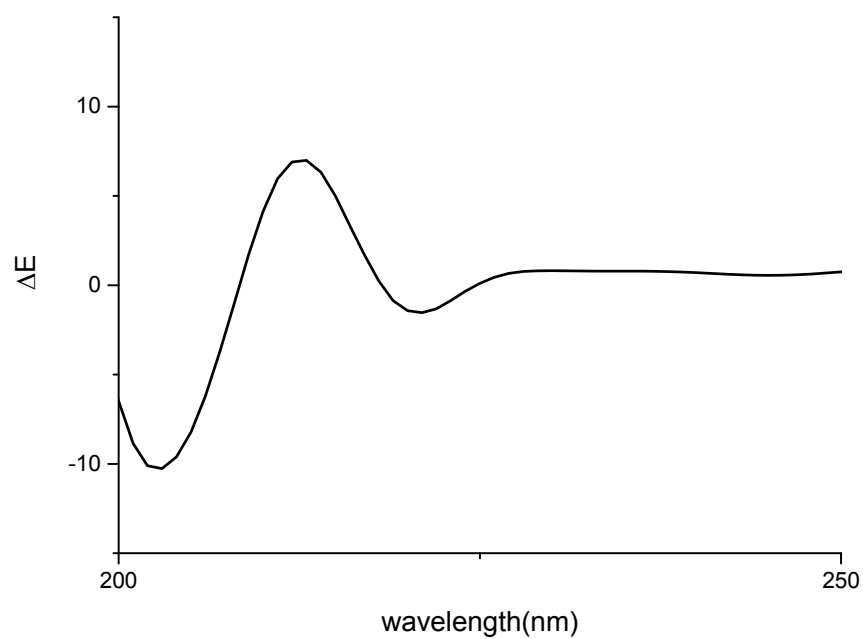

**Figure S27** CD spectra of **7b** in DCM

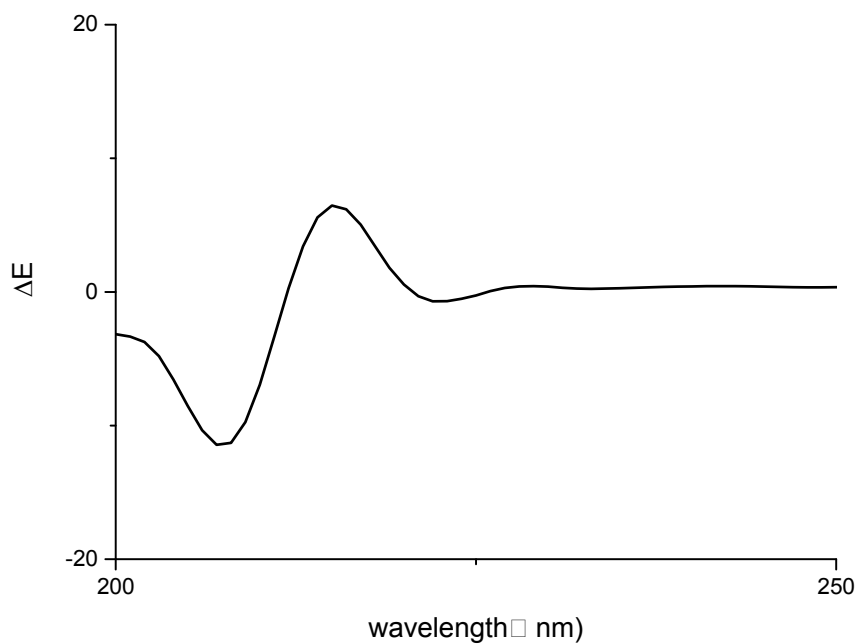

**Figure S28** CD spectra of **7c** in DCM

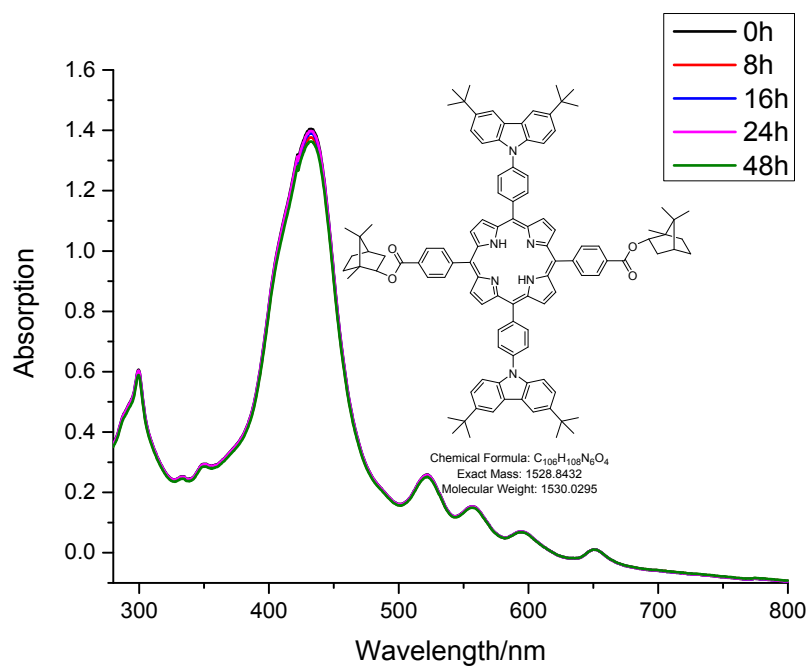

Figure S29 UV-vis spectra of **4a** after 48h in the mixture solvent of DMSO and pH 7.4 PBS from 0h to 48h.

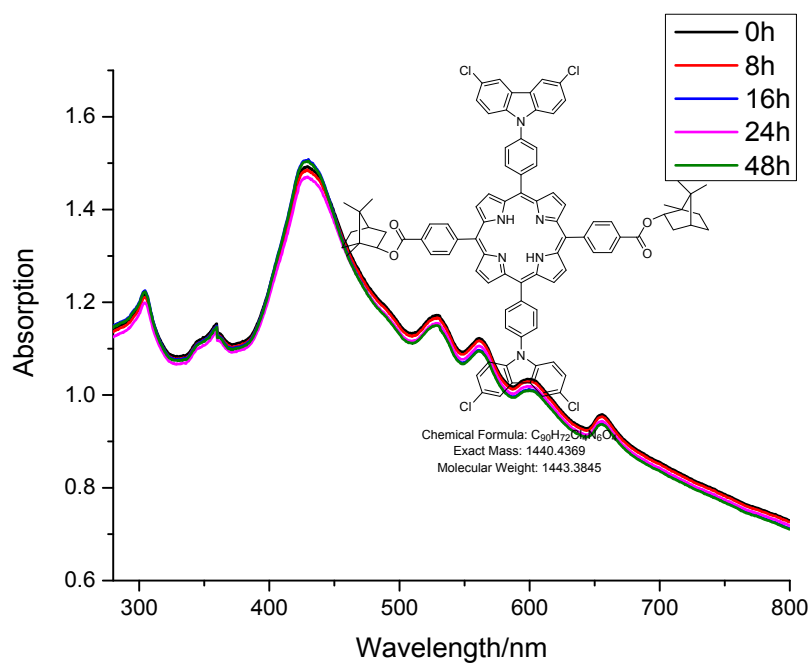

Figure S30 UV-vis spectra of **4b** after 48h in the mixture solvent of DMSO and pH 7.4 PBS from 0h to 48h.

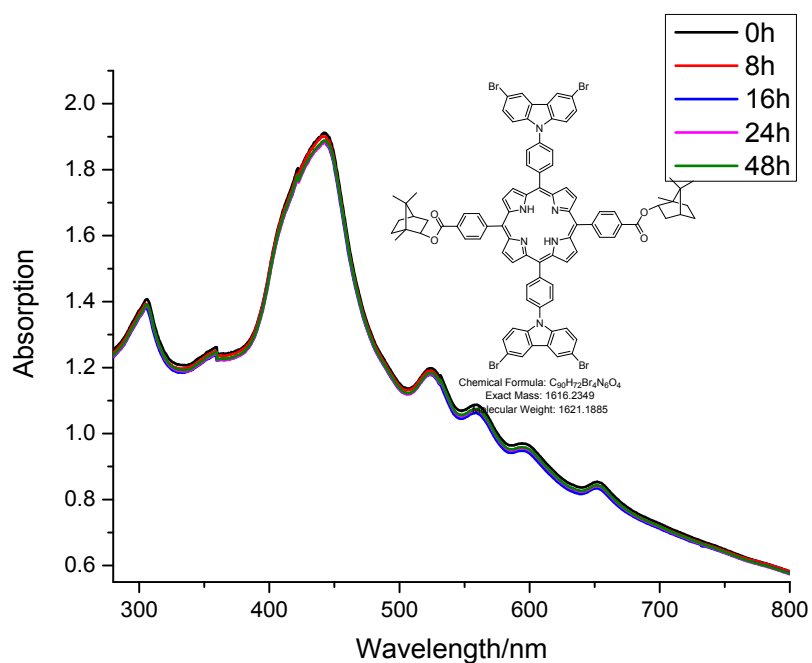

Figure S31 UV-vis spectra of **7b** after 48h in the mixture solvent of DMSO and pH 7.4 PBS from 0h to 48h.

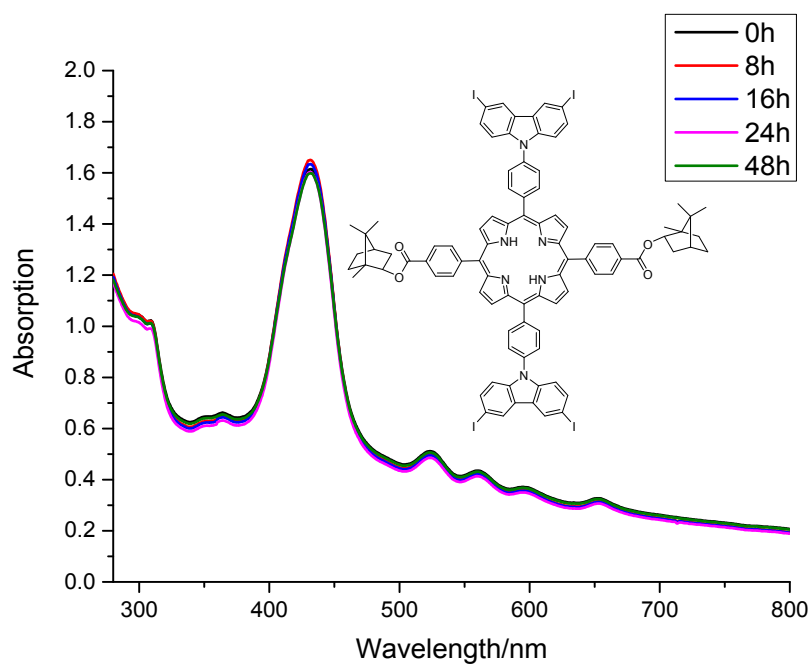

Figure S32 UV-vis spectra of **7c** after 48h in the mixture solvent of DMSO and pH 7.4 PBS from 0h to 48h.

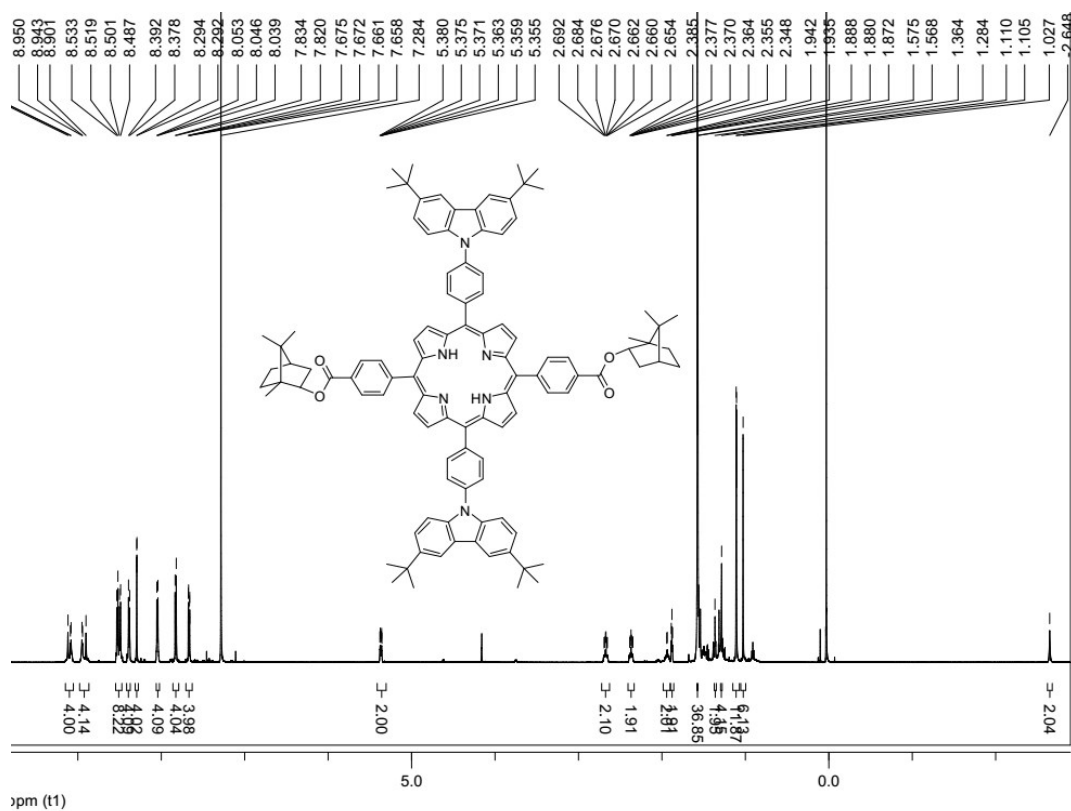

Figure S33 <sup>1</sup>H NMR spectra of **4a** in CDCl<sub>3</sub> (after 48h in the mixture solvent of DMSO and pH 7.4 PBS at 37°C).

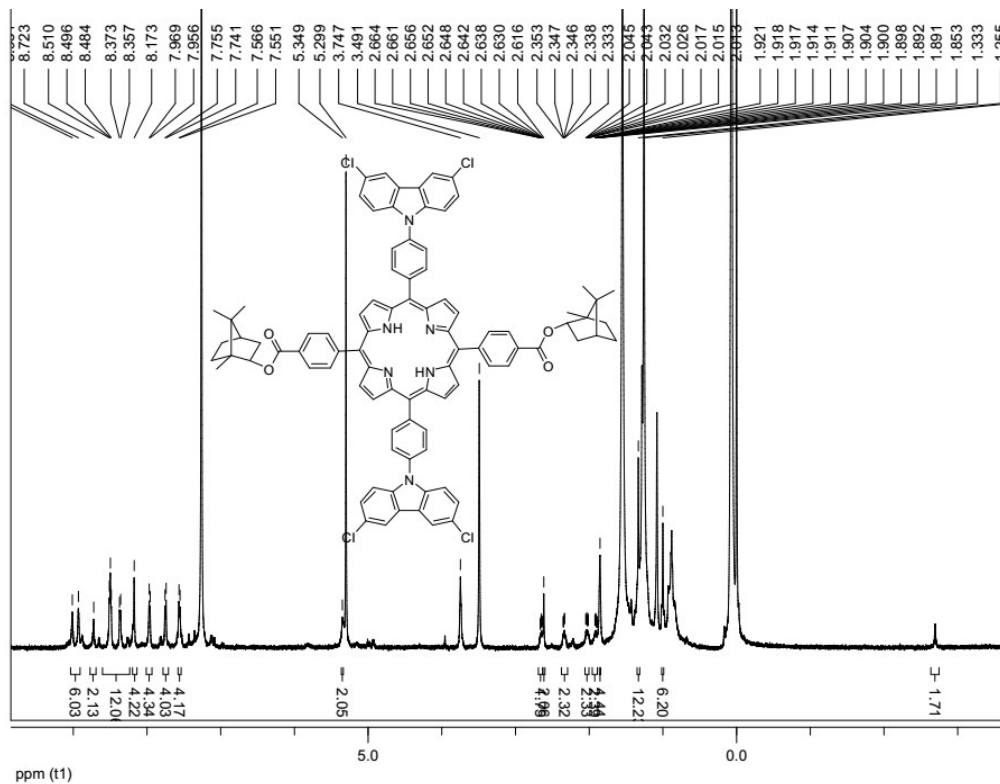

Figure S34 <sup>1</sup>H NMR spectra of **4b** in CDCl<sub>3</sub> (after 48h in the mixture solvent of DMSO and pH 7.4 PBS at 37°C).

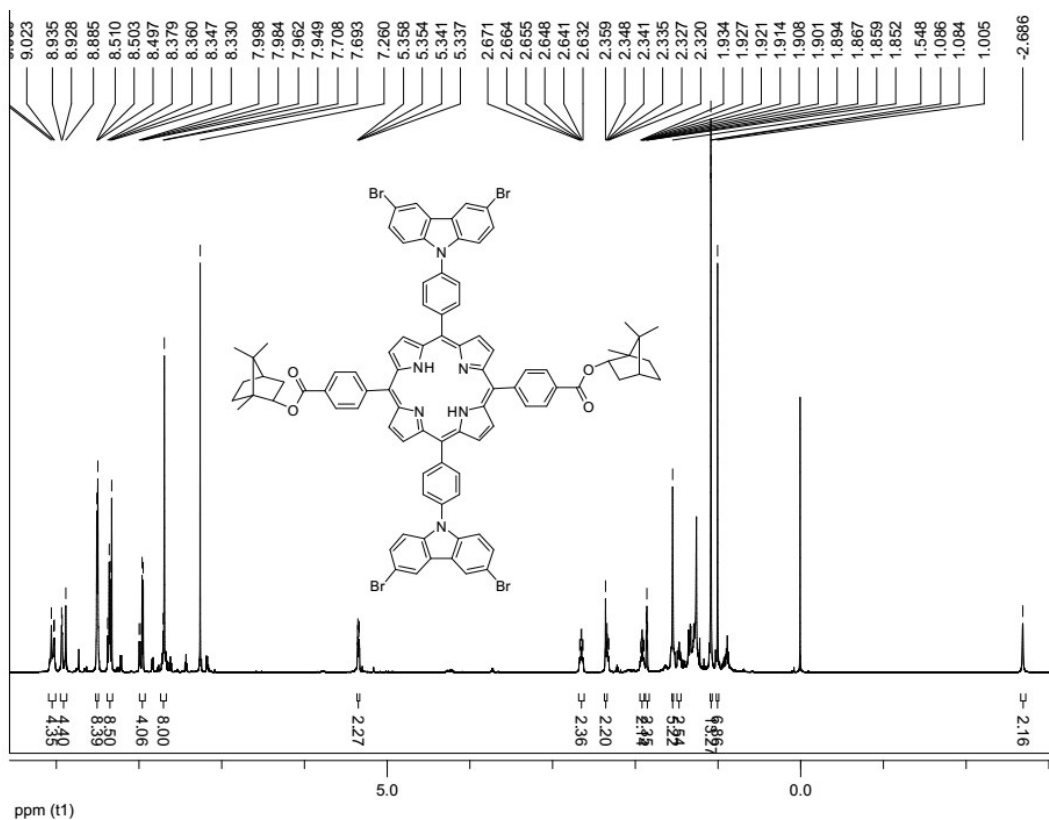

Figure S35  $^1\text{H}$ NMR spectra of **7b** in  $\text{CDCl}_3$  (after 48h in the mixture solvent of DMSO and pH 7.4 PBS at  $37^\circ\text{C}$ ).

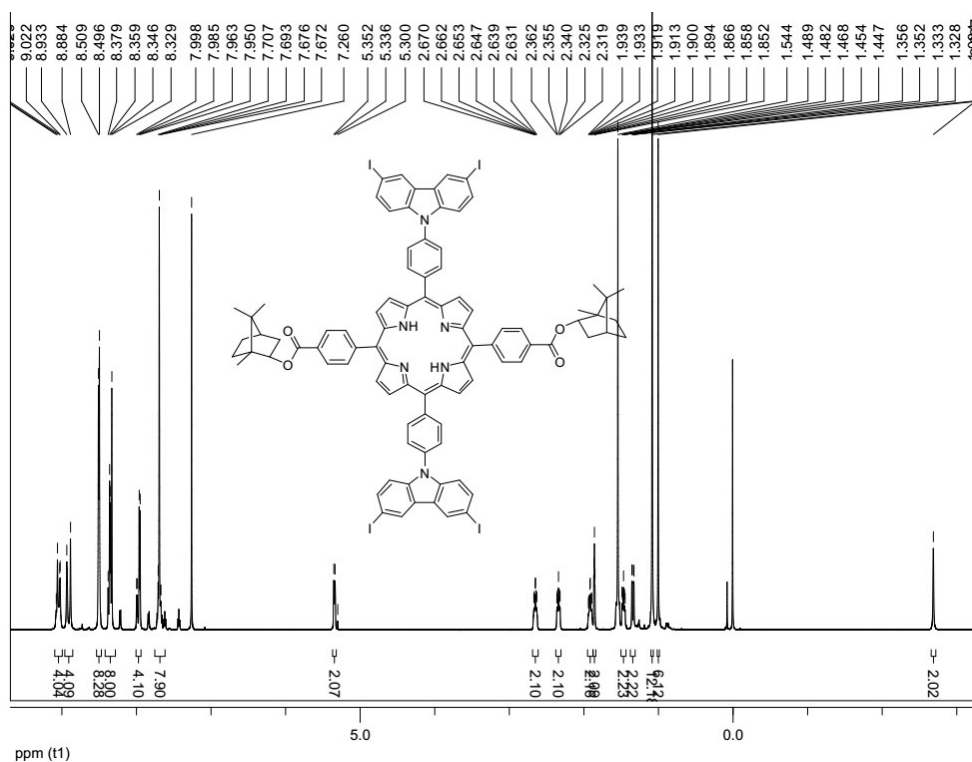

Figure S36  $^1\text{H}$ NMR spectra of **7c** in  $\text{CDCl}_3$  (after 48h in the mixture solvent of DMSO and pH 7.4 PBS at  $37^\circ\text{C}$ ).

## Reference

- S1. Yang X, Lu R, Gai F, et al. *Chem. Commun.* **2010**, 46(7) : 1088-90.
- S2. Lao W, Xu C. *Spectrochimica. Acta. Part A.*, **2000**, 56: 2049-2060.
- S3. Hu B, Lv X, Sun J, et al. *Organic Electronics*, **2013**, 14(6): 1521-1530.
- S4. Chiu S K, Chung Y C, Liou G S, et al., *J. Chin. Chem. Soc.*, **2012**, 59(3): 331-337.
- S5. Xu F, Kim J, Kim H U, et al. *Macromolecules*, **2014**, 47(21): 7397-7406.
- S6. Tracey M M, Moody J L, Waterland M R, et al. *Inorg. Chem.*, **2012**, 51(1): 446-55.
- S7. Vedamalai M, Wu S P. *Euro. J. Org. Chem.*, **2012**, 6: 1158-1163.
- S8. Hsu C, Hsieh M T, Chen Y F, et al. *J. Chin. Chem. Soc.*, **2013**, 60(6): 579-589.
- S9. Haussler M, Liu J. *Macromolecules*, **2007**, 40: 1914-1925.
